# Supplementary material for: Plastic Pollution and Small Juvenile Marine Turtles: A Potential Evolutionary Trap
Source: Frontiers journal article supplement (doi:10.3389/fmars.2021.699521), 2021-08-02
Supplement: Data_Sheet_1.zip [file Data_Sheet_1.zip]

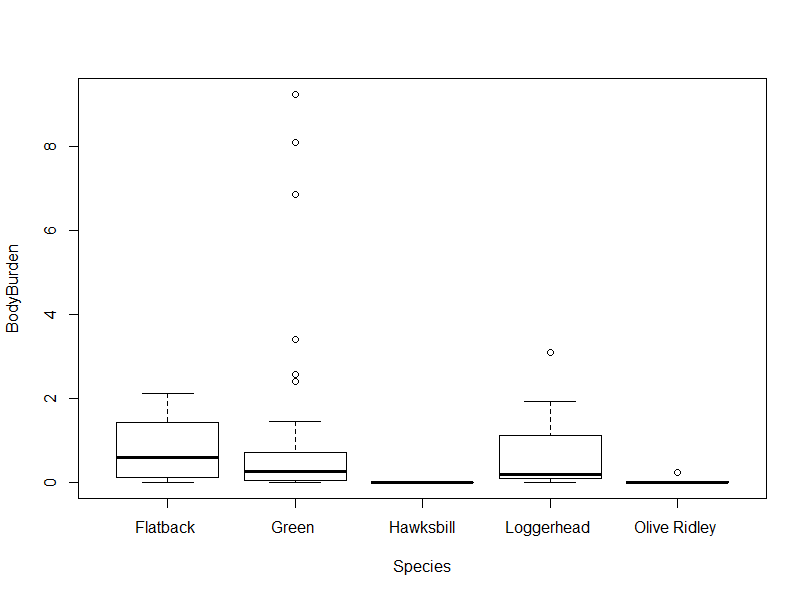

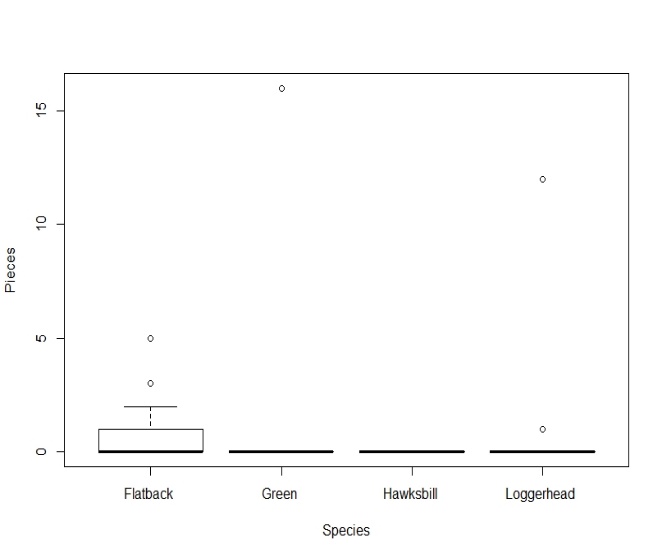

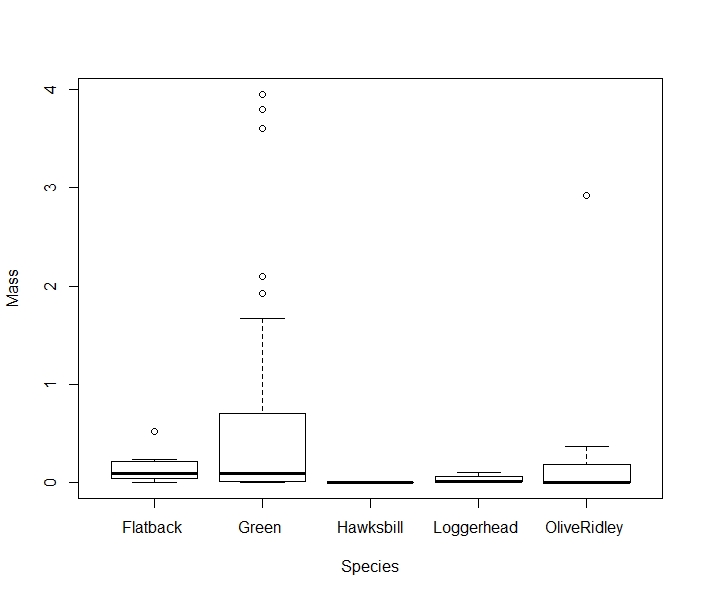
**Supplemental Material**

b)

a)

**PO**

**PO**


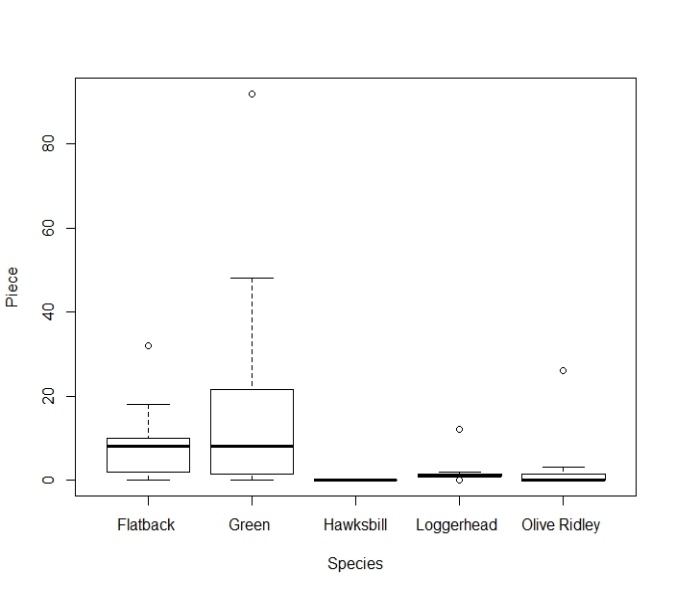


**IO**

**PO**

d)

c)


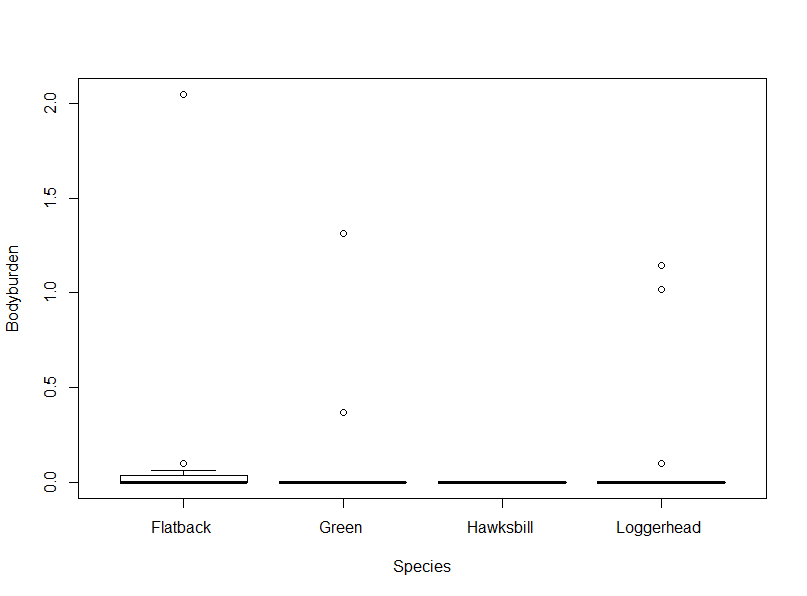
**
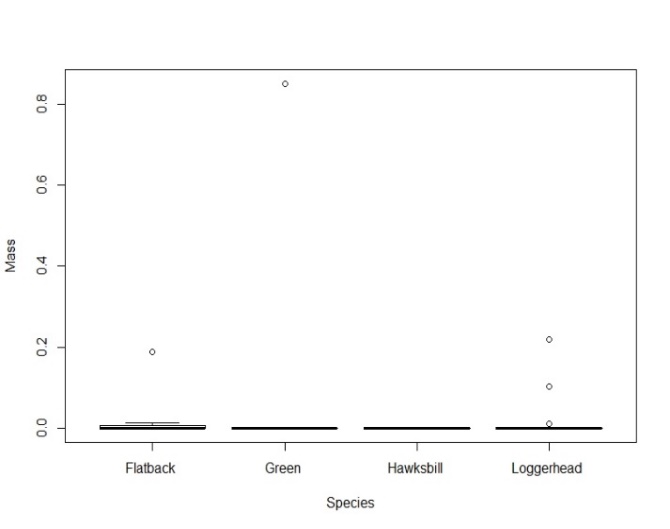
**

**IO**

**IO**

f)

e)

**Figure S2.**  Box and whisker plots: the difference between the PO turtles species a) in the number of plastic pieces ingested b) mass (g) of plastic ingested c) body burden index. The difference between the IO turtles species c) in the number of plastic pieces ingested d) mass (g) of plastic ingested, e) body burden index.
