# Supplementary material for: Plastic Pollution and Small Juvenile Marine Turtles: A Potential Evolutionary Trap
Source: Frontiers journal article supplement (doi:10.3389/fmars.2021.699521), 2021-08-02
Supplement: Table_1.xlsx [file Table_1.xlsx]

## Sheet: Summary
Turtle ID	PO/IO	Strand Year	Stranded/ Bycaught	Species	CCL	SCL	Weight (g)	Weight (kg)	Author necropsied	Author gut processing	Total no. plastic (excl. poth)	Total weight (g)	She	Thr	Foam	Frag	Poth	Ind	Clear	White	Green	Black	Brown	Blue	Yellow	Red	Grey	Orange	Purple/Pink
PO_1	PO	2014	Stranded	Flatback	10.9	8.8912	92	0.092	MH	EMD	9	0.092487	1	1	0	7	0	0	1	8	0	0	0	0	0	0	0	0	0
PO_2	PO	2011	Stranded	Flatback	9.1	7.1848	65	0.065	MH	EMD	7	0.036853	2	0	0	5	0	0	2	4	0	0	0	0	1	0	0	0	0
PO_3	PO	2014	Stranded	Flatback	26.7	23.8696	1800	1.8	MH	EMD	2	0.20948	0	0	2	0	0	0	0	0	2	0	0	0	0	0	0	0	0
PO_4	PO	1996	Stranded	Green	8.3	6.4264	72.1	0.0721	EMD	EMD	13	0.041284	0	0	0	13	0	0	0	4	1	0	0	0	7	0	0	1	0
PO_5	PO	2011	Bycaught	Green	40.5	36.952	UNK	UNK	CJL	EMD	23	0.963002	17	3	0	3	0	0	10	8	1	3	0	0	0	0	0	1	0
PO_6	PO	2011	Bycaught	Green	45.1	41.3128	UNK	UNK	CJL	EMD	35	2.09571	7	1	5	22	0	0	7	24	0	3	0	1	0	0	0	0	0
PO_7	PO	2016	Bycaught	Green	57.1	52.6888	UNK	UNK	EMD	EMD	144	9.23702	127	1	7	9	0	0	122	7	1	2	0	0	8	0	0	3	1
PO_8	PO	1996	Stranded	Green	9.2	7.2796	73	0.073	EMD	EMD	2	0.020958	0	0	0	2	0	0	0	0	1	0	0	0	1	0	0	0	0
PO_9	PO	2016	Bycaught	Green	41.5	37.9	UNK	UNK	EMD	EMD	10	0.7442	7	0	0	2	1	0	2	3	0	4	0	0	0	0	0	0	1
PO_10	PO	2011	Bycaught	Green	UNK	UNK	UNK	UNK	CJL	EMD	39	1.66896	29	5	0	5	0	0	6	19	3	6	3	0	0	0	1	1	0
PO_11	PO	2004	Stranded	Green	24	21.31	UNK	UNK	EMD	EMD	21	0.496261	6	0	0	14	0	1	5	4	1	5	0	0	6	0	0	0	0
PO_12	PO	2014	Stranded	Flatback	10.7	8.7016	112	0.112	MH	EMD	18	0.237389	0	0	0	18	0	0	1	16	0	0	0	0	1	0	0	0	0
PO_13	PO	1993	Stranded	Green	11.6	9.5548	103.9	0.1039	EMD	EMD	1	0.005207	0	0	0	1	0	0	0	0	0	1	0	0	0	0	0	0	0
PO_14	PO	2016	Bycaught	Green	39.3	35.8144	UNK	UNK	EMD	EMD	5	0.334991	2	3	0	0	0	0	3	0	2	0	0	0	0	0	0	0	0
PO_15	PO	2011	Stranded	Green	8.5	6.616	68	0.068	EMD	EMD	10	0.056622	2	0	0	8	0	0	4	5	0	0	0	1	0	0	0	0	0
PO_16	PO	1996	Stranded	Green	6.9	5.0992	40	0.04	EMD	EMD	3	0.024677	0	0	0	3	0	0	0	1	0	0	0	0	2	0	0	0	0
PO_17	PO	2005	Stranded	Green	7.8	5.9524	46	0.046	EMD	EMD	38	0.315246	0	2	0	35	0	1	6	16	6	2	0	4	4	0	0	0	0
PO_18	PO	2014	Stranded	Green	7.4	5.5732	35	0.035	EMD	EMD	11	0.090445	2	0	0	9	0	0	3	2	0	0	0	4	0	1	0	1	0
PO_19	PO	2014	Stranded	Loggerhead	5.8	4.0564	28.8	0.0288	EMD	EMD	1	0.008939	0	0	0	1	0	0	0	1	0	0	0	0	0	0	0	0	0
PO_20	PO	2014	Stranded	Flatback	10.1	8.1328	98.4	0.0984	EMD	EMD	10	0.140327	5	0	0	5	0	0	2	6	0	0	0	2	0	0	0	0	0
PO_21	PO	2014	Stranded	Flatback	8.7	6.8056	57	0.057	MH	EMD	12	0.093292	1	0	0	9	0	0	6	4	0	1	0	1	0	0	0	0	0
PO_22	PO	UNK	Stranded	Flatback	22.9	20.2672	855	0.855	EMD	EMD	32	0.519689	10	0	0	20	2	0	13	15	1	0	0	1	2	0	0	0	0
PO_23	PO	2014	Stranded	Green	6.3	4.5304	32.1	0.0321	EMD	EMD	2	0.000806	1	0	0	1	0	0	0	0	0	0	0	1	0	0	0	1	0
PO_24	PO	1994	Stranded	Green	9.2	7.2796	82.6	0.0826	EMD	EMD	1	0.01774	0	0	0	1	0	0	0	0	0	0	0	0	1	0	0	0	0
PO_25	PO	2017	Stranded	Green	6.4	4.6252	26.6	0.0266	EMD	EMD	3	0.0096	0	1	0	2	0	0	0	2	1	0	0	0	0	0	0	0	0
PO_26	PO	2015	Stranded	Loggerhead	13.9	11.7352	262.7	0.2627	EMD	EMD	1	0.0514	0	0	0	1	0	0	0	1	0	0	0	0	0	0	0	0	0
PO_27	PO	2017	Bycaught	Olive Ridley	48.8	44.8204	13400	13.4	EMD	EMD	3	0.3689	0	0	0	3	0	0	1	1	0	0	0	0	0	0	0	0	1
PO_28	PO	2017	Bycaught	Olive Ridley	46.9	43.0192	12600	12.6	EMD	EMD	26	2.9235	0	0	0	25	1	0	9	16	0	0	0	0	1	0	0	0	0
PO_29	PO	2017	Stranded	Green	6.4	4.6252	22.8	0.0228	EMD	EMD	8	0.055	1	0	0	7	0	0	0	7	0	0	0	1	0	0	0	0	0
PO_30	PO	2017	Bycaught	Green	41.5	37.9	8770	8.77	EMD	EMD	18	3.6085	14	1	0	3	0	0	13	3	2	0	0	0	0	0	0	0	0
PO_31	PO	2017	Bycaught	Green	43.6	39.8908	9560	9.56	EMD	EMD	22	3.9545	6	6	0	8	2	0	2	5	8	3	0	0	4	0	0	0	0
PO_32	PO	2018	Stranded	Flatback	10.3	8.3224	81	0.081	EMD	EMD	0	0	0	0	0	0	0	0	0	0	0	0	0	0	0	0	0	0	0
PO_33	PO	2018	Stranded	Green	8.4	6.5212	74	0.074	EMD	EMD	8	0.107151	0	3	0	5	0	0	2	4		0	0	2	0	0	0	0	0
PO_34	PO	2018	Stranded	Loggerhead	11.1	9.0808	222	0.222	EMD	EMD	1	0.011652	0	0	0	1	0	0	0	1	0	0	0	0	0	0	0	0	0
PO_35	PO	2018	Bycaught	Green	44.8	41.0284	1110	1.11	EMD	EMD	0	0	0	0	0	0	0	0	0	0	0	0	0	0	0	0	0	0	0
PO_36	PO	2018	Bycaught	Olive Ridley	60.7	56.1016	23800	23.8	EMD	EMD	0	0	0	0	0	0	0	0	0	0	0	0	0	0	0	0	0	0	0
PO_37	PO	2018	Bycaught	Olive Ridley	64.2	59.4196	31100	31.1	EMD	EMD	0	0	0	0	0	0	0	0	0	0	0	0	0	0	0	0	0	0	0
PO_38	PO	2018	Bycaught	Green	40.9	37.3312	7200	7.2	EMD	EMD	43	1.92371	13	7	0	23	0	0	6	7	12	1	1	10	0	0	0	6	0
PO_39	PO	2018	Stranded	Loggerhead	7.1	5.2888	53	0.053	EMD	EMD	12	0.102265	1	0	0	10	0	1	1	6	0	1	0	1	0	0	0	0	1
PO_40	PO	2018	Stranded	Green	6.7	4.9096	31	0.031	EMD	EMD	2	0.002377	2	0	0	0	0	0	1	1	0	0	0	0	0	0	0	0	0
PO_41	PO	2018	Stranded	Green	8.4	6.5212	71	0.071	EMD	EMD	92	0.656491	28	12	0	52	0	0	27	41	3	1	0	11	4	4	0	1	0
PO_42	PO	2018	Stranded	Green	8.2	6.3316	76	0.076	EMD	EMD	25	0.259285	2	2	0	20	0	1	11	5	3	1	0	0	1	1	0	0	3
PO_43	PO	2018	Stranded	Loggerhead	5.3	3.5824	20	0.02	EMD	EMD	2	0.061962	0	0	0	2	0	0	0	1	1	0	0	0	0	0	0	0	0
PO_44	PO	2018	Stranded	Green	7.9	6.0472	65	0.065	EMD	EMD	5	0.073262	0	0	0	5	0	0	2	2	0	0	0	1	0	0	0	0	0
PO_45	PO	2018	Stranded	Green	6.9	5.0992	27	0.027	EMD	EMD	0	0	0	0	0	0	0	0	0	0	0	0	0	0	0	0	0	0	0
PO_46	PO	2018	Stranded	Green	10.8	8.7964	114	0.114	EMD	EMD	48	0.923	0	0	0	45	1	2	7	24	3	0	5	1	2	0	3	1	2
PO_47	PO	2019	Stranded	Hawksbill	32.6	29.4628	2310	2.31	EMD	EMD	0	0	0	0	0	0	0	0	0	0	0	0	0	0	0	0	0	0	0
PO_48	PO	2018	Stranded	Hawksbill	31.6	28.5148	1.97	0.00197	EMD	EMD	0	0	0	0	0	0	0	0	0	0	0	0	0	0	0	0	0	0	0
PO_49	PO	2019	Bycaught	Green	37.1	33.7288	5800	5.8	EMD	EMD	11	0.49	8	2	0	1	0	0	3	4	3	1	0	0	0	0	0	0	0
PO_50	PO	2019	Bycaught	Green	37.2	33.8236	7000	7	EMD	EMD	1	0.152	1	0	0	0	0	0	1	0	0	0	0	0	0	0	0	0	0
PO_51	PO	2019	Bycaught	Green	42.9	39.2272	10200	10.2	EMD	EMD	19	3.797	9	0	0	10	0	0	10	6	1	1	0	0	0	0	0	0	1
PO_52	PO	UNK	Bycaught	Green	45.8	41.9764	12450	12.45	EMD	EMD	0	0	0	0	0	0	0	0	0	0	0	0	0	0	0	0	0	0	0
PO_53	PO	2017	Stranded	Hawksbill	32.8	29.6524	2500	2.5	EMD	EMD	0	0	0	0	0	0	0	0	0	0	0	0	0	0	0	0	0	0	0
PO_54	PO	2017	Stranded	Hawksbill	33.1	29.9368	2600	2.6	EMD	EMD	0	0	0	0	0	0	0	0	0	0	0	0	0	0	0	0	0	0	0
PO_55	PO	2017	Bycaught	Olive Ridley	65.3	60.4624	30500	30.5	EMD	EMD	0	0	0	0	0	0	0	0	0	0	0	0	0	0	0	0	0	0	0
PO_56	PO	2017	Bycaught	Olive Ridley	66.7	61.7896	31000	31	EMD	EMD	0	0	0	0	0	0	0	0	0	0	0	0	0	0	0	0	0	0	0
PO_57	PO	2017	Stranded	Green	8.6	6.7108	68	0.068	EMD	EMD	0	0	0	0	0	0	0	0	0	0	0	0	0	0	0	0	0	0	0
PO_58	PO	UNK	Bycaught	Olive Ridley	61.4	56.7652	UNK	UNK	EMD	EMD	0	0	0	0	0	0	0	0	0	0	0	0	0	0	0	0	0	0	0
PO_59	PO	1995	Stranded	Hawksbill	22.3	19.6984	UNK	UNK	EMD	EMD	0	0	0	0	0	0	0	0	0	0	0	0	0	0	0	0	0	0	0
PO_60	PO	1996	Stranded	Green	7.3	5.4784	42.3	0.0423	EMD	EMD	0	0	0	0	0	0	0	0	0	0	0	0	0	0	0	0	0	0	0
PO_61	PO	1994	Stranded	Green	10.1	8.1328	90.7	0.0907	EMD	EMD	0	0	0	0	0	0	0	0	0	0	0	0	0	0	0	0	0	0	0
PO_62	PO	2009	Stranded	Loggerhead	7.3	5.4784	46.1	0.0461	EMD	EMD	1	0.006027	0	0	0	1	0	0	0	0	1	0	0	0	0	0	0	0	0
PO_63	PO	2006	Stranded	Flatback	14.4	12.2092	170	0.17	EMD	EMD	0	0	0	0	0	0	0	0	0	0	0	0	0	0	0	0	0	0	0
PO_64	PO	UNK	Stranded	Flatback	14.8	12.5884	400	0.4	EMD	EMD	6	0.076131	3	0	0	3	0	0	0	4	0	0	1	0	1	0	0	0	0
PO_65	PO	2014	Stranded	Loggerhead	5.2	3.4876	22.4	0.0224	EMD	EMD	0	0	0	0	0	0	0	0	0	0	0	0	0	0	0	0	0	0	0
IO_1	IO	UNK	Stranded	Hawksbill	39.6	36.0988	5000	5	EY	EY/EMD	0	0	0	0	0	0	0	0	0	0	0	0	0	0	0	0	0	0	0
IO_2	IO	2016	Stranded	Flatback	10.8	8.7964	110	0.11	EMD	EMD	0	0	0	0	0	0	0	0	0	0	0	0	0	0	0	0	0	0	0
IO_3	IO	2016	Stranded	Flatback	13.1	10.9768	170	0.17	EY	EY/EMD	0	0	0	0	0	0	0	0	0	0	0	0	0	0	0	0	0	0	0
IO_4	IO	2016	Stranded	Flatback	11.4	9.3652	110	0.11	EY	EY/EMD	0	0	0	0	0	0	0	0	0	0	0	0	0	0	0	0	0	0	0
IO_5	IO	2016	Stranded	Green	41	37.426	3400	3.4	EY	EY/EMD	0	0	0	0	0	0	0	0	0	0	0	0	0	0	0	0	0	0	0
IO_6	IO	2016	Stranded	Hawksbill	35.2	31.9276	2800	2.8	EY	EY/EMD	0	0	0	0	0	0	0	0	0	0	0	0	0	0	0	0	0	0	0
IO_7	IO	2016	Stranded	Green	44.2	40.4596	5100	5.1	EY	EY/EMD	0	0	0	0	0	0	0	0	0	0	0	0	0	0	0	0	0	0	0
IO_8	IO	2016	Stranded	Green	42.5	38.848	7200	7.2	EY	EY/EMD	0	0	0	0	0	0	0	0	0	0	0	0	0	0	0	0	0	0	0
IO_9	IO	UNK	Stranded	Green	44	40.27	7900	7.9	EY	EY/EMD	0	0	0	0	0	0	0	0	0	0	0	0	0	0	0	0	0	0	0
IO_10	IO	2016	Stranded	Flatback	29	26.05	UNK	UNK	EY	EY/EMD	0	0	0	0	0	0	0	0	0	0	0	0	0	0	0	0	0	0	0
IO_11	IO	2016	Stranded	Flatback	12	9.934	100	0.1	EY	EY/EMD	2	0.01	0	2	0	0	0	0	1	1	0	0	0	0	0	0	0	0	0
IO_12	IO	2016	Stranded	Green	43	39.322	UNK	UNK	EY	EY/EMD	0	0	0	0	0	0	0	0	0	0	0	0	0	0	0	0	0	0	0
IO_13	IO	2016	Stranded	Green	39.9	36.3832	5200	5.2	EY	EY/EMD	0	0	0	0	0	0	0	0	0	0	0	0	0	0	0	0	0	0	0
IO_14	IO	2016	Stranded	Flatback	10.3	8.3224	140	0.14	EY	EY/EMD	5	0.014	2	2	0	1	0	0	1	1	0	0	0	3	0	0	0	0	0
IO_15	IO	2016	Stranded	Flatback	16.1	13.8208	210	0.21	EY	EY/EMD	0	0	0	0	0	0	0	0	0	0	0	0	0	0	0	0	0	0	0
IO_16	IO	2016	Stranded	Flatback	15.9	13.6312	400	0.4	EY	EY/EMD	0	0	0	0	0	0	0	0	0	0	0	0	0	0	0	0	0	0	0
IO_17	IO	2016	Stranded	Flatback	9.1	7.1848	610	0.61	EY	EY/EMD	3	0.006	0	3	0	0	0	0	0	2	1	0	0	0	0	0	0	0	0
IO_18	IO	2016	Stranded	Flatback	12.5	10.408	100	0.1	EMD	EMD	0	0	0	0	0	0	0	0	0	0	0	0	0	0	0	0	0	0	0
IO_19	IO	2016	Stranded	Flatback	11	8.986	130	0.13	EMD	EMD	0	0	0	0	0	0	0	0	0	0	0	0	0	0	0	0	0	0	0
IO_20	IO	2016	Stranded	Flatback	14.2	12.0196	270	0.27	EY	EY/EMD	0	0	0	0	0	0	0	0	0	0	0	0	0	0	0	0	0	0	0
IO_21	IO	2016	Stranded	Green	44	40.27	6500	6.5	EY	EY/EMD	0	0	0	0	0	0	0	0	0	0	0	0	0	0	0	0	0	0	0
IO_22	IO	UNK	Stranded	Flatback	10.8	8.7964	91.8	0.0918	EY	EY/EMD	1	0.188	0	0	0	0	1	0	0	0	0	1	0	0	0	0	0	0	0
IO_23	IO	UNK	Stranded	Flatback	12.5	10.408	192	0.192	EY	EY/EMD	3	0.012	2	0	0	1	0	0	0	3	0	0	0	0	0	0	0	0	0
IO_24	IO	2015	Stranded	Flatback	13.2	11.0716	234.5	0.2345	EMD	EMD	0	0	0	0	0	0	0	0	0	0	0	0	0	0	0	0	0	0	0
IO_25	IO	2015	Stranded	Flatback	13.6	11.4508	293	0.293	EMD	EMD	0	0	0	0	0	0	0	0	0	0	0	0	0	0	0	0	0	0	0
IO_26	IO	UNK	Stranded	Flatback	17.4	15.0532	UNK	UNK	EMD	EMD	0	0	0	0	0	0	0	0	0	0	0	0	0	0	0	0	0	0	0
IO_27	IO	UNK	Stranded	Loggerhead	10.3	8.3224	172.4	0.1724	EMD	EMD	0	0	0	0	0	0	0	0	0	0	0	0	0	0	0	0	0	0	0
IO_28	IO	2017	Stranded	Green	43.2	39.5116	6100	6.1	EY	EY/EMD	343	8.016	150	154	0	39	0	0	159	30	58	20	5	46	4	2	12	5	2
IO_29	IO	2017	Stranded	Green	45	41.218	11500	11.5	EY	EY/EMD	0	0	0	0	0	0	0	0	0	0	0	0	0	0	0	0	0	0	0
IO_30	IO	2015	Stranded	Green	45.5	41.692	9400	9.4	EY	EY/EMD	0	0	0	0	0	0	0	0	0	0	0	0	0	0	0	0	0	0	0
IO_31	IO	2017	Stranded	Flatback	16.9	14.5792	430	0.43	EY	EY/EMD	0	0	0	0	0	0	0	0	0	0	0	0	0	0	0	0	0	0	0
IO_32	IO	2017	Stranded	Loggerhead	7.3	5.4784	40	0.04	EY	EY/EMD	0	0	0	0	0	0	0	0	0	0	0	0	0	0	0	0	0	0	0
IO_33	IO	2016	Stranded	Green	44.5	40.744	8600	8.6	EY	EY/EMD	0	0	0	0	0	0	0	0	0	0	0	0	0	0	0	0	0	0	0
IO_34	IO	2017	Stranded	Loggerhead	8.7	6.8056	100	0.1	EY	EY/EMD	12	0.102	2	8	0	2	0	0	2	3	1	0	0	3	2	0	0	0	1
IO_35	IO	2017	Stranded	Green	42.5	38.848	5900	5.9	EY	EY/EMD	0	0	0	0	0	0	0	0	0	0	0	0	0	0	0	0	0	0	0
IO_36	IO	2017	Stranded	Green	40	36.478	5000	5	EY	EY/EMD	0	0	0	0	0	0	0	0	0	0	0	0	0	0	0	0	0	0	0
IO_37	IO	UNK	Stranded	Green	41.6	37.9948	5250	5.25	EY	EY/EMD	0	0	0	0	0	0	0	0	0	0	0	0	0	0	0	0	0	0	0
IO_38	IO	2017	Stranded	Green	41.3	37.7104	UNK	UNK	EY	EY/EMD	0	0	0	0	0	0	0	0	0	0	0	0	0	0	0	0	0	0	0
IO_39	IO	UNK	Stranded	Green	42	38.374	6100	6.1	EY	EY/EMD	0	0	0	0	0	0	0	0	0	0	0	0	0	0	0	0	0	0	0
IO_40	IO	2017	Stranded	Loggerhead	12.3	10.2184	190	0.19	EY	EY/EMD	119	0.218	14	93	0	10	2	0	29	21	21	5	0	30	7	6	0	0	0
IO_41	IO	UNK	Stranded	Green	45.2	41.4076	7200	7.2	EY	EY/EMD	0	0	0	0	0	0	0	0	0	0	0	0	0	0	0	0	0	0	0
IO_42	IO	2018	Stranded	Green	40.7	37.1416	5100	5.1	EY	EY/EMD	0	0	0	0	0	0	0	0	0	0	0	0	0	0	0	0	0	0	0
IO_43	IO	2016	Stranded	Green	41.3	37.7104	5500	5.5	EY	EY/EMD	0	0	0	0	0	0	0	0	0	0	0	0	0	0	0	0	0	0	0
IO_44	IO	UNK	Stranded	Green	42.2	38.5636	6500	6.5	EY	EY/EMD	0	0	0	0	0	0	0	0	0	0	0	0	0	0	0	0	0	0	0
IO_45	IO	2017	Stranded	Loggerhead	7.8	5.9524	70	0.07	EY	EY/EMD	0	0	0	0	0	0	0	0	0	0	0	0	0	0	0	0	0	0	0
IO_46	IO	2017	Stranded	Loggerhead	9	7.09	100	0.1	EY	EY/EMD	1	0.01	0	1	0	0	0	0	0	1	0	0	0	0	0	0	0	0	0
IO_47	IO	2017	Stranded	Loggerhead	8.7	6.8056	130.2	0.1302	EY	EY/EMD	0	0	0	0	0	0	0	0	0	0	0	0	0	0	0	0	0	0	0
IO_48	IO	2017	Stranded	Loggerhead	10.1	8.1328	149.6	0.1496	EY	EY/EMD	0	0	0	0	0	0	0	0	0	0	0	0	0	0	0	0	0	0	0
IO_49	IO	2017	Stranded	Loggerhead	9.7	7.7536	156.2	0.1562	EY	EY/EMD	0	0	0	0	0	0	0	0	0	0	0	0	0	0	0	0	0	0	0
IO_50	IO	2017	Stranded	Loggerhead	10.6	8.6068	201.1	0.2011	EY	EY/EMD	0	0	0	0	0	0	0	0	0	0	0	0	0	0	0	0	0	0	0
IO_51	IO	2017	Stranded	Loggerhead	11.4	9.3652	210.3	0.2103	EY	EY/EMD	0	0	0	0	0	0	0	0	0	0	0	0	0	0	0	0	0	0	0
IO_52	IO	2018	Stranded	Loggerhead	10.7	8.7016	195.3	0.1953	EY	EY/EMD	0	0	0	0	0	0	0	0	0	0	0	0	0	0	0	0	0	0	0
IO_53	IO	2018	Stranded	Loggerhead	9.8	7.8484	125	0.125	EY	EY/EMD	0	0	0	0	0	0	0	0	0	0	0	0	0	0	0	0	0	0	0
IO_54	IO	2018	Stranded	Loggerhead	11.2	9.1756	179.3	0.1793	EY	EY/EMD	0	0	0	0	0	0	0	0	0	0	0	0	0	0	0	0	0	0	0
IO_55	IO	UNK	Stranded	Green	31.8	28.7044	2300	2.3	EY	EY/EMD	16	0.85	8	2	0	5	1	0	7	5	0	3	0	0	0	0	0	1	0
IO_56	IO	2017	Stranded	Green	42.1	38.4688	5300	5.3	EY	EY/EMD	0	0	0	0	0	0	0	0	0	0	0	0	0	0	0	0	0	0	0

## Sheet: TypeColour 
Turtle ID	Location	Year	Species	CCL	Stranded/Bycaught	Type	Length (mm)	Width (mm)	Depth (mm)	Colour
PO_49	PO	2019	Green	37.1	Bycaught	She	132.69	44.77	0.07	Clear
PO_49	PO	2019	Green	37.1	Bycaught	She	52.12	10.83	0.14	Clear
PO_49	PO	2019	Green	37.1	Bycaught	She	43.55	15.22	0.27	Clear
PO_49	PO	2019	Green	37.1	Bycaught	She	16.25	12.92	0.06	White
PO_49	PO	2019	Green	37.1	Bycaught	She	21.87	12.87	0.05	White
PO_49	PO	2019	Green	37.1	Bycaught	She	53.65	8.89	0.07	Green
PO_49	PO	2019	Green	37.1	Bycaught	She	29.48	13.07	0.09	White
PO_49	PO	2019	Green	37.1	Bycaught	She	29.58	15.89	0.24	Black
PO_49	PO	2019	Green	37.1	Bycaught	Frag	40.66	6.88	0.48	White
PO_49	PO	2019	Green	37.1	Bycaught	Thr	40.12	0.17	0.17	Green
PO_49	PO	2019	Green	37.1	Bycaught	Thr	24.01	0.13	0.13	Green
PO_50	PO	2019	Green	37.2	Bycaught	She	119.89	27.99	0.1	Clear
PO_51	PO	2019	Green	42.9	Bycaught	Frag	26.53	8.32	0.53	White
PO_51	PO	2019	Green	42.9	Bycaught	Frag	28.48	6.62	0.52	White
PO_51	PO	2019	Green	42.9	Bycaught	Frag	20.6	6.37	0.48	White
PO_51	PO	2019	Green	42.9	Bycaught	Frag	36.68	8.53	0.82	White
PO_51	PO	2019	Green	42.9	Bycaught	Frag	29.1	6.06	0.79	White
PO_51	PO	2019	Green	42.9	Bycaught	Frag	16.15	9.74	2.31	Pink
PO_51	PO	2019	Green	42.9	Bycaught	Frag	22.2	18.83	1.11	Green
PO_51	PO	2019	Green	42.9	Bycaught	Frag	44.91	18.43	0.83	Clear
PO_51	PO	2019	Green	42.9	Bycaught	She	35.19	8.58	0.08	Black
PO_51	PO	2019	Green	42.9	Bycaught	She	58.71	19.2	0.13	Clear
PO_51	PO	2019	Green	42.9	Bycaught	She	79.13	72.4	0.03	Clear
PO_51	PO	2019	Green	42.9	Bycaught	She	116.14	41.38	0.04	Clear
PO_51	PO	2019	Green	42.9	Bycaught	She	120.32	57.05	0.04	Clear
PO_51	PO	2019	Green	42.9	Bycaught	She	78.12	43.8	0.05	Clear
PO_51	PO	2019	Green	42.9	Bycaught	She	220.71	62.85	0.05	Clear
PO_51	PO	2019	Green	42.9	Bycaught	She	76.54	38.03	0.04	Clear
PO_51	PO	2019	Green	42.9	Bycaught	She	11.85	8.25	0.54	White
PO_51	PO	2019	Green	42.9	Bycaught	Frag	17.65	5.58	1.01	Clear
PO_51	PO	2019	Green	42.9	Bycaught	Frag	7.67	4.29	0.96	Clear
IO_23	IO	UNK	Flatback	12.5	Stranded	She	11.34	7.48	0.01	White
IO_23	IO	UNK	Flatback	12.5	Stranded	She	6.87	4.12	0.01	White
IO_23	IO	UNK	Flatback	12.5	Stranded	Frag	4.43	1.89	0.97	White
IO_11	IO	2016	Flatback	12	Stranded	Thr	35.93	0.35	0.35	White
IO_11	IO	2016	Flatback	12	Stranded	Thr	20.33	0.28	0.28	Clear
IO_14	IO	2016	Flatback	10.3	Stranded	She	9.47	7.81	0.03	White
IO_14	IO	2016	Flatback	10.3	Stranded	She	8.75	5.03	0.04	Clear
IO_14	IO	2016	Flatback	10.3	Stranded	Thr	28.31	0.24	0.24	Blue
IO_14	IO	2016	Flatback	10.3	Stranded	Thr	22.73	0.23	0.23	Blue
IO_14	IO	2016	Flatback	10.3	Stranded	Frag	8.93	2.3	0.22	Blue
IO_17	IO	2016	Flatback	9.1	Stranded	Thr	25.95	0.29	0.29	White
IO_17	IO	2016	Flatback	9.1	Stranded	Thr	19.1	0.12	0.12	White
IO_17	IO	2016	Flatback	9.1	Stranded	Thr	22.19	0.22	0.22	Green
IO_28	IO	2017	Green	43.2	Stranded	She	89.95	48.25	0.16	Clear
IO_28	IO	2017	Green	43.2	Stranded	She	54.71	34.05	0.08	Clear
IO_28	IO	2017	Green	43.2	Stranded	She	80.71	50.19	0.01	Brown
IO_28	IO	2017	Green	43.2	Stranded	She	54.7	30.93	0.01	Brown
IO_28	IO	2017	Green	43.2	Stranded	She	46.75	44.11	0.03	Clear
IO_28	IO	2017	Green	43.2	Stranded	She	36.22	29.52	0.02	Clear
IO_28	IO	2017	Green	43.2	Stranded	She	59.2	21.31	0.01	Clear
IO_28	IO	2017	Green	43.2	Stranded	She	41.31	5.88	0.02	Clear
IO_28	IO	2017	Green	43.2	Stranded	She	48.14	5.88	0.04	Clear
IO_28	IO	2017	Green	43.2	Stranded	She	104.41	9.71	0.13	White
IO_28	IO	2017	Green	43.2	Stranded	She	39.25	17.16	0.03	Clear
IO_28	IO	2017	Green	43.2	Stranded	She	39.34	26.98	0.02	Clear
IO_28	IO	2017	Green	43.2	Stranded	She	31.24	13.78	0.02	Clear
IO_28	IO	2017	Green	43.2	Stranded	She	43.71	23.71	0.04	Clear
IO_28	IO	2017	Green	43.2	Stranded	She	40.79	26.79	0.05	Green
IO_28	IO	2017	Green	43.2	Stranded	She	25.4	11.5	0.03	Clear
IO_28	IO	2017	Green	43.2	Stranded	She	30.14	12.78	0.02	Clear
IO_28	IO	2017	Green	43.2	Stranded	She	15.28	14.4	0.11	Clear
IO_28	IO	2017	Green	43.2	Stranded	She	21.3	14.63	0.01	Clear
IO_28	IO	2017	Green	43.2	Stranded	She	29.3	6	0.02	Clear
IO_28	IO	2017	Green	43.2	Stranded	She	21.36	6.52	0.01	Clear
IO_28	IO	2017	Green	43.2	Stranded	She	17.25	9.03	0.03	Clear
IO_28	IO	2017	Green	43.2	Stranded	She	17.21	7.4	0.02	Clear
IO_28	IO	2017	Green	43.2	Stranded	Thr	137.21	0.35	0.35	White
IO_28	IO	2017	Green	43.2	Stranded	Thr	94.09	0.29	0.29	Black
IO_28	IO	2017	Green	43.2	Stranded	Thr	199.82	0.21	0.21	Blue
IO_28	IO	2017	Green	43.2	Stranded	Thr	119.46	0.21	0.21	Green
IO_28	IO	2017	Green	43.2	Stranded	Thr	297.51	0.26	0.26	Green
IO_28	IO	2017	Green	43.2	Stranded	Thr	122.56	0.22	0.22	Green
IO_28	IO	2017	Green	43.2	Stranded	Thr	291.04	0.3	0.3	Blue
IO_28	IO	2017	Green	43.2	Stranded	Thr	50.27	1.22	1.22	White
IO_28	IO	2017	Green	43.2	Stranded	Thr	170.09	0.58	0.58	Green
IO_28	IO	2017	Green	43.2	Stranded	Thr	108.09	0.75	0.75	Green
IO_28	IO	2017	Green	43.2	Stranded	Thr	36.61	1.04	1.04	Green
IO_28	IO	2017	Green	43.2	Stranded	Thr	14.91	0.15	0.15	White
IO_28	IO	2017	Green	43.2	Stranded	Thr	43.9	2.09	2.09	Green
IO_28	IO	2017	Green	43.2	Stranded	Thr	145.86	0.28	0.28	Green
IO_28	IO	2017	Green	43.2	Stranded	Thr	44.64	0.44	0.44	Clear
IO_28	IO	2017	Green	43.2	Stranded	Thr	44.93	0.15	0.15	Green
IO_28	IO	2017	Green	43.2	Stranded	Thr	67.83	0.58	0.58	Blue
IO_28	IO	2017	Green	43.2	Stranded	Thr	37.61	0.11	0.11	White
IO_28	IO	2017	Green	43.2	Stranded	Thr	36.71	0.67	0.67	Green
IO_28	IO	2017	Green	43.2	Stranded	Thr	78.06	0.32	0.32	Green
IO_28	IO	2017	Green	43.2	Stranded	Thr	78.71	0.12	0.12	Blue
IO_28	IO	2017	Green	43.2	Stranded	Thr	198.72	0.17	0.17	White
IO_28	IO	2017	Green	43.2	Stranded	Thr	103.44	0.03	0.03	Blue
IO_28	IO	2017	Green	43.2	Stranded	Thr	116.87	0.09	0.09	White
IO_28	IO	2017	Green	43.2	Stranded	Thr	35.64	0.21	0.21	Green
IO_28	IO	2017	Green	43.2	Stranded	Thr	39.58	0.04	0.04	White
IO_28	IO	2017	Green	43.2	Stranded	Thr	101.48	0.23	0.23	Black
IO_28	IO	2017	Green	43.2	Stranded	She	31.93	21.98	0.26	Purple
IO_28	IO	2017	Green	43.2	Stranded	She	32.4	9.68	0.36	Green
IO_28	IO	2017	Green	43.2	Stranded	Thr	12.64	0.01	0.01	White
IO_28	IO	2017	Green	43.2	Stranded	She	77.61	37.61	0.1	Black
IO_28	IO	2017	Green	43.2	Stranded	She	44.16	18.28	0.11	Black
IO_28	IO	2017	Green	43.2	Stranded	She	38.76	11.69	0.05	Black
IO_28	IO	2017	Green	43.2	Stranded	She	35.46	16.42	0.04	Black
IO_28	IO	2017	Green	43.2	Stranded	She	42.72	19.42	0.04	Black
IO_28	IO	2017	Green	43.2	Stranded	She	38.52	30.56	0.05	Clear
IO_28	IO	2017	Green	43.2	Stranded	She	24.56	9.03	0.17	Clear
IO_28	IO	2017	Green	43.2	Stranded	She	17.45	5.61	0.04	Clear
IO_28	IO	2017	Green	43.2	Stranded	She	10.97	9.11	0.09	Clear
IO_28	IO	2017	Green	43.2	Stranded	She	13.48	7.8	0.02	Clear
IO_28	IO	2017	Green	43.2	Stranded	She	15.05	6.04	0.02	Clear
IO_28	IO	2017	Green	43.2	Stranded	She	28.82	18.51	0.02	Black
IO_28	IO	2017	Green	43.2	Stranded	She	18.79	8.25	0.01	Clear
IO_28	IO	2017	Green	43.2	Stranded	She	27.14	10.14	0.02	White
IO_28	IO	2017	Green	43.2	Stranded	She	24.04	13.17	0.01	Clear
IO_28	IO	2017	Green	43.2	Stranded	She	26.03	15.02	0.06	Clear
IO_28	IO	2017	Green	43.2	Stranded	She	18.71	7.46	0.03	Black
IO_28	IO	2017	Green	43.2	Stranded	She	29.61	8.93	0.01	Clear
IO_28	IO	2017	Green	43.2	Stranded	She	22.45	6.72	0.05	Clear
IO_28	IO	2017	Green	43.2	Stranded	She	18.47	10.32	0.41	Clear
IO_28	IO	2017	Green	43.2	Stranded	She	26.92	6.74	0.18	Clear
IO_28	IO	2017	Green	43.2	Stranded	She	20.43	13.13	0.02	Clear
IO_28	IO	2017	Green	43.2	Stranded	She	18.88	5.83	0.1	Clear
IO_28	IO	2017	Green	43.2	Stranded	She	16.75	8.71	0.05	Clear
IO_28	IO	2017	Green	43.2	Stranded	She	16.49	5.58	0.03	Blue
IO_28	IO	2017	Green	43.2	Stranded	She	28.07	9.3	0.16	Blue
IO_28	IO	2017	Green	43.2	Stranded	She	13.82	3.51	0.07	Clear
IO_28	IO	2017	Green	43.2	Stranded	She	18.19	4.08	0.04	Clear
IO_28	IO	2017	Green	43.2	Stranded	She	20.06	2.79	0.02	Clear
IO_28	IO	2017	Green	43.2	Stranded	She	14.61	6.01	0.09	Clear
IO_28	IO	2017	Green	43.2	Stranded	She	14.3	6.44	0.02	Clear
IO_28	IO	2017	Green	43.2	Stranded	She	10.3	3.05	0.02	Blue
IO_28	IO	2017	Green	43.2	Stranded	She	9.43	5.84	0.04	Clear
IO_28	IO	2017	Green	43.2	Stranded	She	15.22	5.27	0.04	White
IO_28	IO	2017	Green	43.2	Stranded	She	11.98	5.2	0.01	Clear
IO_28	IO	2017	Green	43.2	Stranded	She	10.28	9.15	0.09	Clear
IO_28	IO	2017	Green	43.2	Stranded	She	6.77	6.55	0.15	Clear
IO_28	IO	2017	Green	43.2	Stranded	Frag	63.41	6.37	0.51	Brown
IO_28	IO	2017	Green	43.2	Stranded	Frag	32.14	5.62	1.21	White
IO_28	IO	2017	Green	43.2	Stranded	Frag	22.29	6.03	0.96	Clear
IO_28	IO	2017	Green	43.2	Stranded	Frag	23.15	6.04	1.19	Clear
IO_28	IO	2017	Green	43.2	Stranded	Frag	8.63	6.07	0.97	Clear
IO_28	IO	2017	Green	43.2	Stranded	Frag	9.39	5.59	0.87	Clear
IO_28	IO	2017	Green	43.2	Stranded	Frag	11.9	7.32	0.42	Blue
IO_28	IO	2017	Green	43.2	Stranded	Frag	14.8	5.56	0.65	Blue
IO_28	IO	2017	Green	43.2	Stranded	Frag	9.37	3.9	0.61	Blue
IO_28	IO	2017	Green	43.2	Stranded	Frag	9.81	6.05	0.69	Blue
IO_28	IO	2017	Green	43.2	Stranded	Frag	24.31	4.33	0.73	White
IO_28	IO	2017	Green	43.2	Stranded	Frag	14.25	8.6	1.12	Clear
IO_28	IO	2017	Green	43.2	Stranded	Frag	9.33	6.23	0.75	Clear
IO_28	IO	2017	Green	43.2	Stranded	Frag	10.2	5.73	1.04	Clear
IO_28	IO	2017	Green	43.2	Stranded	Frag	7.28	3.39	1.35	White
IO_28	IO	2017	Green	43.2	Stranded	Frag	5.69	5.44	0.85	Clear
IO_28	IO	2017	Green	43.2	Stranded	Frag	7.5	5.65	0.84	Clear
IO_28	IO	2017	Green	43.2	Stranded	Frag	5.99	4.07	0.54	Clear
IO_28	IO	2017	Green	43.2	Stranded	Frag	11.94	5.53	0.44	Green
IO_28	IO	2017	Green	43.2	Stranded	Frag	7.53	4.73	0.22	Grey
IO_28	IO	2017	Green	43.2	Stranded	Frag	8.77	5.51	0.51	White
IO_28	IO	2017	Green	43.2	Stranded	Frag	7.2	4.96	0.62	Clear
IO_28	IO	2017	Green	43.2	Stranded	Frag	4.17	3.68	0.48	Clear
IO_28	IO	2017	Green	43.2	Stranded	Frag	5.19	3.52	0.61	Clear
IO_28	IO	2017	Green	43.2	Stranded	Frag	5.49	3.49	0.1	Blue
IO_28	IO	2017	Green	43.2	Stranded	Frag	5.01	1.96	0.67	Blue
IO_28	IO	2017	Green	43.2	Stranded	Frag	6.6	5.43	0.79	Clear
IO_28	IO	2017	Green	43.2	Stranded	Frag	10.57	3.18	0.85	Clear
IO_28	IO	2017	Green	43.2	Stranded	Frag	12.24	3.22	0.65	Clear
IO_28	IO	2017	Green	43.2	Stranded	Frag	3.51	2.16	0.69	Green
IO_28	IO	2017	Green	43.2	Stranded	Frag	6.7	4.05	1.15	White
IO_28	IO	2017	Green	43.2	Stranded	Frag	18.39	7.14	1.05	Clear
IO_28	IO	2017	Green	43.2	Stranded	Frag	16.14	7.39	0.13	Grey
IO_28	IO	2017	Green	43.2	Stranded	Frag	4.58	3.67	0.43	Clear
IO_28	IO	2017	Green	43.2	Stranded	Frag	3.23	2.53	1.2	Green
IO_28	IO	2017	Green	43.2	Stranded	Frag	6.27	1.45	2.12	Black
IO_28	IO	2017	Green	43.2	Stranded	Frag	15.36	3.85	0.1	Clear
IO_28	IO	2017	Green	43.2	Stranded	Frag	8.26	5.26	0.21	White
IO_28	IO	2017	Green	43.2	Stranded	Frag	9.36	2.73	0.73	Clear
IO_28	IO	2017	Green	43.2	Stranded	Thr	21.66	0.5	0.5	Blue
IO_28	IO	2017	Green	43.2	Stranded	Thr	142.86	0.1	0.1	Green
IO_28	IO	2017	Green	43.2	Stranded	Thr	123.36	0.19	0.19	White
IO_28	IO	2017	Green	43.2	Stranded	Thr	67.55	0.32	0.32	Black
IO_28	IO	2017	Green	43.2	Stranded	Thr	90.57	0.33	0.33	Clear
IO_28	IO	2017	Green	43.2	Stranded	Thr	60.31	0.26	0.26	Blue
IO_28	IO	2017	Green	43.2	Stranded	Thr	74.41	0.19	0.19	Blue
IO_28	IO	2017	Green	43.2	Stranded	Thr	31.66	0.24	0.24	Brown
IO_28	IO	2017	Green	43.2	Stranded	Thr	124.48	0.3	0.3	Green
IO_28	IO	2017	Green	43.2	Stranded	Thr	173.6	0.11	0.11	Green
IO_28	IO	2017	Green	43.2	Stranded	Thr	70.33	0.33	0.33	Black
IO_28	IO	2017	Green	43.2	Stranded	Thr	38.81	0.39	0.39	Black
IO_28	IO	2017	Green	43.2	Stranded	Thr	109.32	0.31	0.31	Blue
IO_28	IO	2017	Green	43.2	Stranded	Thr	65.48	0.32	0.32	Blue
IO_28	IO	2017	Green	43.2	Stranded	Thr	43.66	0.27	0.27	Blue
IO_28	IO	2017	Green	43.2	Stranded	Thr	39.89	0.14	0.14	Black
IO_28	IO	2017	Green	43.2	Stranded	Thr	106.91	0.17	0.17	Green
IO_28	IO	2017	Green	43.2	Stranded	Thr	83.06	0.26	0.26	White
IO_28	IO	2017	Green	43.2	Stranded	Thr	35.25	0.29	0.29	Green
IO_28	IO	2017	Green	43.2	Stranded	Thr	29.16	0.16	0.16	Orange
IO_28	IO	2017	Green	43.2	Stranded	Thr	92.49	0.22	0.22	Grey
IO_28	IO	2017	Green	43.2	Stranded	Thr	110.07	0.04	0.04	Blue
IO_28	IO	2017	Green	43.2	Stranded	Thr	30.71	0.19	0.19	Blue
IO_28	IO	2017	Green	43.2	Stranded	Thr	36.55	0.27	0.27	Green
IO_28	IO	2017	Green	43.2	Stranded	Thr	15.54	0.25	0.25	Grey
IO_28	IO	2017	Green	43.2	Stranded	Thr	21.66	0.16	0.16	Orange
IO_28	IO	2017	Green	43.2	Stranded	Thr	57.06	0.18	0.18	Green
IO_28	IO	2017	Green	43.2	Stranded	Thr	28.99	0.47	0.47	Yellow
IO_28	IO	2017	Green	43.2	Stranded	Thr	67.37	0.3	0.3	Grey
IO_28	IO	2017	Green	43.2	Stranded	Thr	28.31	0.23	0.23	Yellow
IO_28	IO	2017	Green	43.2	Stranded	Thr	72.19	0.14	0.14	Blue
IO_28	IO	2017	Green	43.2	Stranded	Thr	189.54	0.26	0.26	White
IO_28	IO	2017	Green	43.2	Stranded	Thr	34.15	0.18	0.18	Brown
IO_28	IO	2017	Green	43.2	Stranded	Thr	31.6	0.22	0.22	Black
IO_28	IO	2017	Green	43.2	Stranded	Thr	62.4	0.31	0.31	Green
IO_28	IO	2017	Green	43.2	Stranded	Thr	35.14	0.17	0.17	Green
IO_28	IO	2017	Green	43.2	Stranded	Thr	100.02	0.13	0.13	Green
IO_28	IO	2017	Green	43.2	Stranded	Thr	42.14	0.19	0.19	Green
IO_28	IO	2017	Green	43.2	Stranded	Thr	34.94	0.16	0.16	Green
IO_28	IO	2017	Green	43.2	Stranded	Thr	54.24	0.15	0.15	White
IO_28	IO	2017	Green	43.2	Stranded	Thr	86.12	0.24	0.24	Yellow
IO_28	IO	2017	Green	43.2	Stranded	Thr	125.12	0.13	0.13	Green
IO_28	IO	2017	Green	43.2	Stranded	Thr	28.05	0.09	0.09	Orange
IO_28	IO	2017	Green	43.2	Stranded	Thr	53.15	0.25	0.25	Grey
IO_28	IO	2017	Green	43.2	Stranded	Thr	52.09	0.27	0.27	Blue
IO_28	IO	2017	Green	43.2	Stranded	Thr	42.39	0.27	0.27	Grey
IO_28	IO	2017	Green	43.2	Stranded	Thr	20.93	0.22	0.22	Blue
IO_28	IO	2017	Green	43.2	Stranded	Thr	24.17	0.27	0.27	Black
IO_28	IO	2017	Green	43.2	Stranded	Thr	20.17	0.29	0.29	Blue
IO_28	IO	2017	Green	43.2	Stranded	Thr	20.33	0.21	0.21	Green
IO_28	IO	2017	Green	43.2	Stranded	Thr	22.18	0.2	0.2	White
IO_28	IO	2017	Green	43.2	Stranded	Thr	82.17	0.19	0.19	Green
IO_28	IO	2017	Green	43.2	Stranded	Thr	24.17	0.25	0.25	Red
IO_28	IO	2017	Green	43.2	Stranded	Thr	52.11	0.11	0.11	Red
IO_28	IO	2017	Green	43.2	Stranded	Thr	14.67	0.31	0.31	Blue
IO_28	IO	2017	Green	43.2	Stranded	Thr	20.66	0.23	0.23	Blue
IO_28	IO	2017	Green	43.2	Stranded	Thr	40.77	0.22	0.22	White
IO_28	IO	2017	Green	43.2	Stranded	Thr	17.33	0.22	0.22	Blue
IO_28	IO	2017	Green	43.2	Stranded	Thr	31.93	0.3	0.3	Green
IO_28	IO	2017	Green	43.2	Stranded	Thr	118.39	0.14	0.14	Black
IO_28	IO	2017	Green	43.2	Stranded	Thr	11.34	0.67	0.67	Blue
IO_28	IO	2017	Green	43.2	Stranded	Thr	15.05	0.39	0.39	Green
IO_28	IO	2017	Green	43.2	Stranded	Thr	12.12	0.25	0.25	Blue
IO_28	IO	2017	Green	43.2	Stranded	Thr	108.34	0.21	0.21	Green
IO_28	IO	2017	Green	43.2	Stranded	Thr	17.65	0.22	0.22	Green
IO_28	IO	2017	Green	43.2	Stranded	Thr	25.01	0.22	0.22	Green
IO_28	IO	2017	Green	43.2	Stranded	Thr	21.1	0.44	0.44	Pink
IO_28	IO	2017	Green	43.2	Stranded	Thr	11.63	0.23	0.23	Blue
IO_28	IO	2017	Green	43.2	Stranded	Thr	20.64	0.1	0.1	Orange
IO_28	IO	2017	Green	43.2	Stranded	Thr	25.6	0.08	0.08	Clear
IO_28	IO	2017	Green	43.2	Stranded	Thr	10.97	0.27	0.27	Green
IO_28	IO	2017	Green	43.2	Stranded	Thr	16.69	0.32	0.32	Black
IO_28	IO	2017	Green	43.2	Stranded	Thr	15.6	0.17	0.17	White
IO_28	IO	2017	Green	43.2	Stranded	Thr	18.73	0.43	0.43	Green
IO_28	IO	2017	Green	43.2	Stranded	Thr	56.63	0.19	0.19	Clear
IO_28	IO	2017	Green	43.2	Stranded	Thr	19.41	0.25	0.25	Green
IO_28	IO	2017	Green	43.2	Stranded	Thr	92.4	0.2	0.2	Clear
IO_28	IO	2017	Green	43.2	Stranded	Thr	115.14	0.4	0.4	Clear
IO_28	IO	2017	Green	43.2	Stranded	Thr	27.78	0.32	0.32	Blue
IO_28	IO	2017	Green	43.2	Stranded	Thr	17.29	0.23	0.23	Blue
IO_28	IO	2017	Green	43.2	Stranded	Thr	21.28	0.48	0.48	Green
IO_28	IO	2017	Green	43.2	Stranded	Thr	10.1	0.43	0.43	Yellow
IO_28	IO	2017	Green	43.2	Stranded	Thr	34.48	0.16	0.16	Green
IO_28	IO	2017	Green	43.2	Stranded	Thr	33.71	0.18	0.18	Blue
IO_28	IO	2017	Green	43.2	Stranded	Thr	30.7	0.26	0.26	Blue
IO_28	IO	2017	Green	43.2	Stranded	Thr	34.1	0.15	0.15	Orange
IO_28	IO	2017	Green	43.2	Stranded	Thr	12.95	0.25	0.25	Blue
IO_28	IO	2017	Green	43.2	Stranded	Thr	17.91	0.43	0.43	Blue
IO_28	IO	2017	Green	43.2	Stranded	Thr	14.43	0.3	0.3	Green
IO_28	IO	2017	Green	43.2	Stranded	Thr	41.83	0.2	0.2	Grey
IO_28	IO	2017	Green	43.2	Stranded	Thr	42.16	0.16	0.16	Green
IO_28	IO	2017	Green	43.2	Stranded	Thr	19.08	0.2	0.2	Blue
IO_28	IO	2017	Green	43.2	Stranded	Thr	14.88	0.27	0.27	Blue
IO_28	IO	2017	Green	43.2	Stranded	Thr	8.4	0.44	0.44	Blue
IO_28	IO	2017	Green	43.2	Stranded	Thr	8.32	0.17	0.17	Green
IO_28	IO	2017	Green	43.2	Stranded	Thr	18.32	0.2	0.2	Green
IO_28	IO	2017	Green	43.2	Stranded	Thr	23.96	0.37	0.37	White
IO_28	IO	2017	Green	43.2	Stranded	Thr	27.17	0.21	0.21	Green
IO_28	IO	2017	Green	43.2	Stranded	Thr	27.95	0.36	0.36	Green
IO_28	IO	2017	Green	43.2	Stranded	Thr	11.75	0.24	0.24	Green
IO_28	IO	2017	Green	43.2	Stranded	Thr	8.28	0.43	0.43	Blue
IO_28	IO	2017	Green	43.2	Stranded	Thr	8.78	0.19	0.19	Blue
IO_28	IO	2017	Green	43.2	Stranded	Thr	19.13	0.25	0.25	Green
IO_28	IO	2017	Green	43.2	Stranded	Thr	55.69	0.29	0.29	Grey
IO_28	IO	2017	Green	43.2	Stranded	Thr	24.69	0.36	0.36	Green
IO_28	IO	2017	Green	43.2	Stranded	Thr	25.1	0.28	0.28	White
IO_28	IO	2017	Green	43.2	Stranded	Thr	33.82	0.19	0.19	Grey
IO_28	IO	2017	Green	43.2	Stranded	Thr	57.84	0.12	0.12	White
IO_28	IO	2017	Green	43.2	Stranded	Thr	37.84	0.2	0.2	Green
IO_28	IO	2017	Green	43.2	Stranded	Thr	22.39	0.32	0.32	Green
IO_28	IO	2017	Green	43.2	Stranded	Thr	24.13	0.11	0.11	Clear
IO_28	IO	2017	Green	43.2	Stranded	Thr	23.15	0.23	0.23	Green
IO_28	IO	2017	Green	43.2	Stranded	Thr	17.56	0.34	0.34	Green
IO_28	IO	2017	Green	43.2	Stranded	Thr	7.43	0.2	0.2	Blue
IO_28	IO	2017	Green	43.2	Stranded	Thr	24.95	0.27	0.27	Grey
IO_28	IO	2017	Green	43.2	Stranded	Thr	23.7	0.11	0.11	Green
IO_28	IO	2017	Green	43.2	Stranded	Thr	21.21	0.29	0.29	Black
IO_28	IO	2017	Green	43.2	Stranded	Thr	17.85	0.13	0.13	Clear
IO_28	IO	2017	Green	43.2	Stranded	Thr	15	0.2	0.2	Green
IO_28	IO	2017	Green	43.2	Stranded	Thr	11.31	0.15	0.15	Black
IO_28	IO	2017	Green	43.2	Stranded	Thr	21.55	0.24	0.24	Green
IO_28	IO	2017	Green	43.2	Stranded	Thr	12.78	0.15	0.15	Clear
IO_28	IO	2017	Green	43.2	Stranded	Thr	12.78	0.22	0.22	Clear
IO_28	IO	2017	Green	43.2	Stranded	Thr	17.39	0.21	0.21	Blue
IO_28	IO	2017	Green	43.2	Stranded	Thr	11.1	0.11	0.11	Blue
IO_28	IO	2017	Green	43.2	Stranded	Thr	13.59	0.21	0.21	Grey
IO_28	IO	2017	Green	43.2	Stranded	She	27.1	13.13	0.04	Clear
IO_28	IO	2017	Green	43.2	Stranded	She	26.1	14.16	0.06	Clear
IO_28	IO	2017	Green	43.2	Stranded	She	13.83	10.83	0.05	Clear
IO_28	IO	2017	Green	43.2	Stranded	She	20.56	12.3	0.09	Clear
IO_28	IO	2017	Green	43.2	Stranded	She	50.49	6.6	0.36	Clear
IO_28	IO	2017	Green	43.2	Stranded	She	16.21	12.59	0.15	Clear
IO_28	IO	2017	Green	43.2	Stranded	She	14.21	13.79	0.03	White
IO_28	IO	2017	Green	43.2	Stranded	She	21.17	6.15	0.07	Clear
IO_28	IO	2017	Green	43.2	Stranded	She	19.1	16.37	0.04	Clear
IO_28	IO	2017	Green	43.2	Stranded	She	22.1	17.36	0.5	Clear
IO_28	IO	2017	Green	43.2	Stranded	She	16.59	11.71	0.08	Clear
IO_28	IO	2017	Green	43.2	Stranded	She	10.2	7.56	0.02	Clear
IO_28	IO	2017	Green	43.2	Stranded	She	19.05	16.08	0.11	Clear
IO_28	IO	2017	Green	43.2	Stranded	She	25.2	5.63	0.03	Clear
IO_28	IO	2017	Green	43.2	Stranded	She	21.17	10.09	0.04	Clear
IO_28	IO	2017	Green	43.2	Stranded	She	20.17	11.37	0.1	Clear
IO_28	IO	2017	Green	43.2	Stranded	She	17.97	5.86	0.11	Clear
IO_28	IO	2017	Green	43.2	Stranded	She	12.26	6.95	0.05	Clear
IO_28	IO	2017	Green	43.2	Stranded	She	26.16	10.38	0.08	Clear
IO_28	IO	2017	Green	43.2	Stranded	She	15.53	8.58	0.01	Clear
IO_28	IO	2017	Green	43.2	Stranded	She	23.09	6.59	0.11	Clear
IO_28	IO	2017	Green	43.2	Stranded	She	21.11	3.9	0.09	Clear
IO_28	IO	2017	Green	43.2	Stranded	She	35.52	5.04	0.06	Clear
IO_28	IO	2017	Green	43.2	Stranded	She	16.12	11.02	0.03	Clear
IO_28	IO	2017	Green	43.2	Stranded	She	10.92	7.33	0.02	Clear
IO_28	IO	2017	Green	43.2	Stranded	She	13.97	7.65	0.02	Clear
IO_28	IO	2017	Green	43.2	Stranded	She	13.43	3.16	0.25	Clear
IO_28	IO	2017	Green	43.2	Stranded	She	11.24	5.24	0.04	Clear
IO_28	IO	2017	Green	43.2	Stranded	She	14.33	11.15	0.06	Clear
IO_28	IO	2017	Green	43.2	Stranded	She	18.43	8.59	0.1	Clear
IO_28	IO	2017	Green	43.2	Stranded	She	12.97	6.94	0.05	White
IO_28	IO	2017	Green	43.2	Stranded	She	22.2	5.48	0.09	Clear
IO_28	IO	2017	Green	43.2	Stranded	She	10.74	6.01	0.14	Clear
IO_28	IO	2017	Green	43.2	Stranded	She	16.42	7.06	0.06	Clear
IO_28	IO	2017	Green	43.2	Stranded	She	13.32	6.52	0.02	Clear
IO_28	IO	2017	Green	43.2	Stranded	She	26.72	6.48	0.02	Clear
IO_28	IO	2017	Green	43.2	Stranded	She	15.42	9.1	0.17	Clear
IO_28	IO	2017	Green	43.2	Stranded	She	9.99	9.05	0.06	Clear
IO_28	IO	2017	Green	43.2	Stranded	She	12.24	8.38	0.27	Clear
IO_28	IO	2017	Green	43.2	Stranded	She	14.04	5.07	0.08	Clear
IO_28	IO	2017	Green	43.2	Stranded	She	9.59	7.28	0.06	Clear
IO_28	IO	2017	Green	43.2	Stranded	She	20.45	6.7	0.01	Clear
IO_28	IO	2017	Green	43.2	Stranded	She	15.91	3.91	0.05	Clear
IO_28	IO	2017	Green	43.2	Stranded	She	15.35	4.2	0.2	Clear
IO_28	IO	2017	Green	43.2	Stranded	She	8.59	5.17	0.02	Clear
IO_28	IO	2017	Green	43.2	Stranded	She	17.22	5.94	0.03	Clear
IO_28	IO	2017	Green	43.2	Stranded	She	13.41	7.04	0.05	Clear
IO_28	IO	2017	Green	43.2	Stranded	She	29.61	1.6	0.11	Clear
IO_28	IO	2017	Green	43.2	Stranded	She	8.53	6.58	0.06	White
IO_28	IO	2017	Green	43.2	Stranded	She	13.03	2.23	0.18	Clear
IO_28	IO	2017	Green	43.2	Stranded	She	25.1	2.32	0.02	Clear
IO_28	IO	2017	Green	43.2	Stranded	She	9.6	5.62	0.01	Clear
IO_28	IO	2017	Green	43.2	Stranded	She	12.43	5.16	0.08	Clear
IO_28	IO	2017	Green	43.2	Stranded	She	8.59	8.43	0.08	Clear
IO_28	IO	2017	Green	43.2	Stranded	She	8.05	6.77	0.05	Clear
IO_28	IO	2017	Green	43.2	Stranded	She	13.57	6.87	0.04	Clear
IO_28	IO	2017	Green	43.2	Stranded	She	5.6	3.61	0.02	Clear
IO_28	IO	2017	Green	43.2	Stranded	She	10.67	5.39	0.01	Clear
IO_28	IO	2017	Green	43.2	Stranded	She	10.81	8.11	0.1	Clear
IO_28	IO	2017	Green	43.2	Stranded	She	10.14	2.56	0.02	Clear
IO_28	IO	2017	Green	43.2	Stranded	She	10.39	7.1	0.01	Clear
IO_28	IO	2017	Green	43.2	Stranded	She	9.67	6.15	0.01	Clear
IO_28	IO	2017	Green	43.2	Stranded	She	11.12	5.2	0.01	Clear
IO_28	IO	2017	Green	43.2	Stranded	She	11.69	5.21	0.06	Clear
IO_28	IO	2017	Green	43.2	Stranded	She	5.47	3.02	0.02	Clear
IO_28	IO	2017	Green	43.2	Stranded	She	5.41	4.44	0.02	Clear
IO_28	IO	2017	Green	43.2	Stranded	She	9.25	2.97	0.15	Clear
IO_28	IO	2017	Green	43.2	Stranded	She	5.69	4.22	0.01	Clear
IO_28	IO	2017	Green	43.2	Stranded	She	5.55	4.42	0.02	Clear
IO_28	IO	2017	Green	43.2	Stranded	She	5.69	2.42	0.01	Clear
IO_28	IO	2017	Green	43.2	Stranded	She	6.59	5.1	0.02	Clear
IO_28	IO	2017	Green	43.2	Stranded	She	5.39	2.07	0.01	Clear
IO_28	IO	2017	Green	43.2	Stranded	She	4.43	3.01	0.02	Clear
IO_28	IO	2017	Green	43.2	Stranded	She	4.54	3.73	0.01	Clear
IO_28	IO	2017	Green	43.2	Stranded	She	6.64	2.62	0.02	Clear
IO_28	IO	2017	Green	43.2	Stranded	She	6.25	5.88	0.01	Clear
IO_28	IO	2017	Green	43.2	Stranded	She	4.61	3.3	0.02	Clear
IO_28	IO	2017	Green	43.2	Stranded	She	4.43	3.22	0.01	Clear
IO_28	IO	2017	Green	43.2	Stranded	She	6.84	3.07	0.01	Clear
IO_28	IO	2017	Green	43.2	Stranded	She	7.64	2.06	0.02	Clear
IO_28	IO	2017	Green	43.2	Stranded	She	5.23	3.44	0.01	Clear
IO_28	IO	2017	Green	43.2	Stranded	She	3.63	1.82	0.01	Clear
IO_28	IO	2017	Green	43.2	Stranded	She	3.58	2.19	0.02	Clear
IO_28	IO	2017	Green	43.2	Stranded	She	3.31	2.88	0.02	Clear
IO_28	IO	2017	Green	43.2	Stranded	She	5.73	1.73	0.01	Clear
IO_28	IO	2017	Green	43.2	Stranded	She	5.7	1.69	0.01	Clear
IO_28	IO	2017	Green	43.2	Stranded	She	3.05	2.07	0.02	Clear
IO_28	IO	2017	Green	43.2	Stranded	She	3.07	1.98	0.02	Clear
IO_47	IO	2017	Loggerhead	8.7	Stranded	Thr	14.43	0.27	0.27	Yellow
IO_47	IO	2017	Loggerhead	8.7	Stranded	Thr	15.68	0.36	0.36	Yellow
IO_47	IO	2017	Loggerhead	8.7	Stranded	Thr	26.68	0.34	0.34	Blue
IO_47	IO	2017	Loggerhead	8.7	Stranded	Thr	24.64	0.31	0.31	Blue
IO_47	IO	2017	Loggerhead	8.7	Stranded	Thr	19.68	0.36	0.36	Blue
IO_47	IO	2017	Loggerhead	8.7	Stranded	Thr	6.99	0.35	0.35	Clear
IO_47	IO	2017	Loggerhead	8.7	Stranded	Thr	16.77	0.24	0.24	Clear
IO_47	IO	2017	Loggerhead	8.7	Stranded	Thr	5.36	0.29	0.29	Pink
IO_47	IO	2017	Loggerhead	8.7	Stranded	She	10.1	2.24	0.18	White
IO_47	IO	2017	Loggerhead	8.7	Stranded	She	12.6	6.2	0.16	White
IO_47	IO	2017	Loggerhead	8.7	Stranded	Frag	8.63	6.76	0.77	Green
IO_47	IO	2017	Loggerhead	8.7	Stranded	Frag	10.59	3.9	1.97	White
IO_40	IO	2017	Loggerhead	12.3	Stranded	Thr	16.3	0.42	0.42	Green
IO_40	IO	2017	Loggerhead	12.3	Stranded	Thr	16.22	0.23	0.23	Blue
IO_40	IO	2017	Loggerhead	12.3	Stranded	Thr	9.43	0.8	0.8	Blue
IO_40	IO	2017	Loggerhead	12.3	Stranded	Thr	20.43	0.26	0.26	Blue
IO_40	IO	2017	Loggerhead	12.3	Stranded	Thr	12	0.21	0.21	Blue
IO_40	IO	2017	Loggerhead	12.3	Stranded	Thr	24.76	0.3	0.3	Clear
IO_40	IO	2017	Loggerhead	12.3	Stranded	Thr	27.73	0.22	0.22	Green
IO_40	IO	2017	Loggerhead	12.3	Stranded	Thr	7.41	0.13	0.13	Black
IO_40	IO	2017	Loggerhead	12.3	Stranded	Thr	8	0.22	0.22	Green
IO_40	IO	2017	Loggerhead	12.3	Stranded	Thr	15.3	0.24	0.24	Clear
IO_40	IO	2017	Loggerhead	12.3	Stranded	Thr	10.02	0.16	0.16	Green
IO_40	IO	2017	Loggerhead	12.3	Stranded	Thr	24.48	0.51	0.51	Blue
IO_40	IO	2017	Loggerhead	12.3	Stranded	Thr	9.26	0.2	0.2	Blue
IO_40	IO	2017	Loggerhead	12.3	Stranded	Thr	7.44	0.27	0.27	Blue
IO_40	IO	2017	Loggerhead	12.3	Stranded	Thr	6.34	0.04	0.04	Red
IO_40	IO	2017	Loggerhead	12.3	Stranded	Thr	16.39	0.4	0.4	Clear
IO_40	IO	2017	Loggerhead	12.3	Stranded	Thr	10.23	0.2	0.2	Clear
IO_40	IO	2017	Loggerhead	12.3	Stranded	Thr	6.56	0.23	0.23	Blue
IO_40	IO	2017	Loggerhead	12.3	Stranded	Thr	8.56	0.31	0.31	Blue
IO_40	IO	2017	Loggerhead	12.3	Stranded	Thr	13.36	0.29	0.29	Blue
IO_40	IO	2017	Loggerhead	12.3	Stranded	Thr	11.53	0.18	0.18	Green
IO_40	IO	2017	Loggerhead	12.3	Stranded	Thr	22.74	0.34	0.34	Blue
IO_40	IO	2017	Loggerhead	12.3	Stranded	Thr	23.66	0.14	0.14	Black
IO_40	IO	2017	Loggerhead	12.3	Stranded	Thr	17.11	0.47	0.47	Blue
IO_40	IO	2017	Loggerhead	12.3	Stranded	Thr	19.03	0.36	0.36	Blue
IO_40	IO	2017	Loggerhead	12.3	Stranded	Thr	27.13	0.26	0.26	Yellow
IO_40	IO	2017	Loggerhead	12.3	Stranded	Thr	15.15	0.23	0.23	Blue
IO_40	IO	2017	Loggerhead	12.3	Stranded	Thr	22.29	0.33	0.33	Green
IO_40	IO	2017	Loggerhead	12.3	Stranded	Thr	14.22	0.23	0.23	Blue
IO_40	IO	2017	Loggerhead	12.3	Stranded	Thr	14.71	0.18	0.18	Green
IO_40	IO	2017	Loggerhead	12.3	Stranded	Thr	17.91	0.21	0.21	White
IO_40	IO	2017	Loggerhead	12.3	Stranded	Thr	15.08	0.27	0.27	Blue
IO_40	IO	2017	Loggerhead	12.3	Stranded	Thr	15.02	0.25	0.25	Green
IO_40	IO	2017	Loggerhead	12.3	Stranded	Thr	12.09	0.44	0.44	Green
IO_40	IO	2017	Loggerhead	12.3	Stranded	Thr	13.12	0.33	0.33	Blue
IO_40	IO	2017	Loggerhead	12.3	Stranded	Thr	17.04	0.17	0.17	Blue
IO_40	IO	2017	Loggerhead	12.3	Stranded	Thr	20.17	0.23	0.23	Green
IO_40	IO	2017	Loggerhead	12.3	Stranded	Thr	10.59	0.44	0.44	Blue
IO_40	IO	2017	Loggerhead	12.3	Stranded	Thr	7.63	0.3	0.3	Blue
IO_40	IO	2017	Loggerhead	12.3	Stranded	Thr	7.55	0.18	0.18	Blue
IO_40	IO	2017	Loggerhead	12.3	Stranded	Thr	11.55	0.07	0.07	Red
IO_40	IO	2017	Loggerhead	12.3	Stranded	Thr	20.03	0.23	0.23	Clear
IO_40	IO	2017	Loggerhead	12.3	Stranded	Thr	13.84	0.18	0.18	Green
IO_40	IO	2017	Loggerhead	12.3	Stranded	Thr	18.66	0.3	0.3	Clear
IO_40	IO	2017	Loggerhead	12.3	Stranded	Thr	18.03	0.21	0.21	Yellow
IO_40	IO	2017	Loggerhead	12.3	Stranded	Thr	12.56	0.16	0.16	Green
IO_40	IO	2017	Loggerhead	12.3	Stranded	Thr	15.06	0.3	0.3	Blue
IO_40	IO	2017	Loggerhead	12.3	Stranded	Thr	6.31	0.15	0.15	Green
IO_40	IO	2017	Loggerhead	12.3	Stranded	Thr	12.31	0.23	0.23	Red
IO_40	IO	2017	Loggerhead	12.3	Stranded	Thr	7.63	0.35	0.35	Green
IO_40	IO	2017	Loggerhead	12.3	Stranded	Thr	17.62	0.19	0.19	Green
IO_40	IO	2017	Loggerhead	12.3	Stranded	Thr	9.56	0.2	0.2	Green
IO_40	IO	2017	Loggerhead	12.3	Stranded	Thr	20.1	0.27	0.27	Clear
IO_40	IO	2017	Loggerhead	12.3	Stranded	Thr	10.14	0.48	0.48	Clear
IO_40	IO	2017	Loggerhead	12.3	Stranded	Thr	14.64	0.17	0.17	Green
IO_40	IO	2017	Loggerhead	12.3	Stranded	Thr	5.8	0.27	0.27	Blue
IO_40	IO	2017	Loggerhead	12.3	Stranded	Thr	5.44	0.25	0.25	Blue
IO_40	IO	2017	Loggerhead	12.3	Stranded	Thr	7.37	0.34	0.34	Blue
IO_40	IO	2017	Loggerhead	12.3	Stranded	Thr	6.63	0.26	0.26	Yellow
IO_40	IO	2017	Loggerhead	12.3	Stranded	Thr	42.9	0.13	0.13	Yellow
IO_40	IO	2017	Loggerhead	12.3	Stranded	Thr	15.28	0.25	0.25	Clear
IO_40	IO	2017	Loggerhead	12.3	Stranded	Thr	13.38	0.3	0.3	Yellow
IO_40	IO	2017	Loggerhead	12.3	Stranded	Thr	11.78	0.27	0.27	Clear
IO_40	IO	2017	Loggerhead	12.3	Stranded	Thr	10.41	0.36	0.36	White
IO_40	IO	2017	Loggerhead	12.3	Stranded	Thr	7.46	0.23	0.23	Yellow
IO_40	IO	2017	Loggerhead	12.3	Stranded	Thr	6.4	0.23	0.23	Clear
IO_40	IO	2017	Loggerhead	12.3	Stranded	Thr	5.99	0.17	0.17	Green
IO_40	IO	2017	Loggerhead	12.3	Stranded	Thr	5.31	0.34	0.34	Yellow
IO_40	IO	2017	Loggerhead	12.3	Stranded	Thr	10.93	0.34	0.34	Clear
IO_40	IO	2017	Loggerhead	12.3	Stranded	Thr	7.94	0.31	0.31	Clear
IO_40	IO	2017	Loggerhead	12.3	Stranded	Thr	9.55	0.34	0.34	Clear
IO_40	IO	2017	Loggerhead	12.3	Stranded	Thr	6.59	0.28	0.28	Clear
IO_40	IO	2017	Loggerhead	12.3	Stranded	Thr	12	0.36	0.36	White
IO_40	IO	2017	Loggerhead	12.3	Stranded	Thr	6.86	0.41	0.41	White
IO_40	IO	2017	Loggerhead	12.3	Stranded	Thr	11.38	0.18	0.18	Green
IO_40	IO	2017	Loggerhead	12.3	Stranded	Thr	5.4	0.22	0.22	Blue
IO_40	IO	2017	Loggerhead	12.3	Stranded	Thr	11.52	0.23	0.23	Clear
IO_40	IO	2017	Loggerhead	12.3	Stranded	Thr	12.78	0.23	0.23	Clear
IO_40	IO	2017	Loggerhead	12.3	Stranded	Thr	5.83	0.29	0.29	White
IO_40	IO	2017	Loggerhead	12.3	Stranded	Thr	5.09	0.28	0.28	White
IO_40	IO	2017	Loggerhead	12.3	Stranded	Thr	4.74	0.23	0.23	Clear
IO_40	IO	2017	Loggerhead	12.3	Stranded	Thr	4.76	0.41	0.41	Black
IO_40	IO	2017	Loggerhead	12.3	Stranded	Thr	4.08	0.07	0.07	Green
IO_40	IO	2017	Loggerhead	12.3	Stranded	Thr	3.83	0.18	0.18	White
IO_40	IO	2017	Loggerhead	12.3	Stranded	Thr	6.31	0.07	0.07	Red
IO_40	IO	2017	Loggerhead	12.3	Stranded	Thr	8.5	0.3	0.3	White
IO_40	IO	2017	Loggerhead	12.3	Stranded	Thr	6.58	0.15	0.15	White
IO_40	IO	2017	Loggerhead	12.3	Stranded	Thr	7.68	0.33	0.33	White
IO_40	IO	2017	Loggerhead	12.3	Stranded	Thr	8.54	0.24	0.24	Clear
IO_40	IO	2017	Loggerhead	12.3	Stranded	Thr	16.4	0.09	0.09	Black
IO_40	IO	2017	Loggerhead	12.3	Stranded	Thr	9.36	0.26	0.26	Clear
IO_40	IO	2017	Loggerhead	12.3	Stranded	Thr	6.01	0.26	0.26	Black
IO_40	IO	2017	Loggerhead	12.3	Stranded	Thr	7.33	0.17	0.17	Green
IO_40	IO	2017	Loggerhead	12.3	Stranded	She	10.7	6.3	0.04	Blue
IO_40	IO	2017	Loggerhead	12.3	Stranded	She	7.37	1.68	0.05	Blue
IO_40	IO	2017	Loggerhead	12.3	Stranded	She	7.29	1.97	0.2	White
IO_40	IO	2017	Loggerhead	12.3	Stranded	She	5.25	4.61	0.03	White
IO_40	IO	2017	Loggerhead	12.3	Stranded	She	12.58	1.72	0.06	Clear
IO_40	IO	2017	Loggerhead	12.3	Stranded	She	5.74	2.08	0.02	White
IO_40	IO	2017	Loggerhead	12.3	Stranded	She	9.68	3.53	0.02	White
IO_40	IO	2017	Loggerhead	12.3	Stranded	She	5.69	2.31	0.03	Clear
IO_40	IO	2017	Loggerhead	12.3	Stranded	She	4.94	3.05	0.02	Clear
IO_40	IO	2017	Loggerhead	12.3	Stranded	She	5.39	2.41	0.03	Clear
IO_40	IO	2017	Loggerhead	12.3	Stranded	She	9.37	2.57	0.02	Clear
IO_40	IO	2017	Loggerhead	12.3	Stranded	She	5.31	3.72	0.03	White
IO_40	IO	2017	Loggerhead	12.3	Stranded	She	7.06	2.61	0.05	Clear
IO_40	IO	2017	Loggerhead	12.3	Stranded	She	6.06	1.03	0.02	Blue
IO_40	IO	2017	Loggerhead	12.3	Stranded	Poth	4.08	0.47	0.12	Red
IO_40	IO	2017	Loggerhead	12.3	Stranded	Poth	10.7	0.63	0.12	Red
IO_40	IO	2017	Loggerhead	12.3	Stranded	Frag	7.99	5.28	0.31	White
IO_40	IO	2017	Loggerhead	12.3	Stranded	Frag	5.92	4.58	0.48	Blue
IO_40	IO	2017	Loggerhead	12.3	Stranded	Frag	6.58	4.19	0.31	White
IO_40	IO	2017	Loggerhead	12.3	Stranded	Frag	4.48	2.78	0.57	White
IO_40	IO	2017	Loggerhead	12.3	Stranded	Frag	4.58	2.59	0.5	White
IO_40	IO	2017	Loggerhead	12.3	Stranded	Frag	4.08	1.94	0.53	White
IO_40	IO	2017	Loggerhead	12.3	Stranded	Frag	3.69	1.48	1.67	Clear
IO_40	IO	2017	Loggerhead	12.3	Stranded	Frag	6.27	5.1	0.16	Clear
IO_40	IO	2017	Loggerhead	12.3	Stranded	Frag	2.84	2.42	0.69	White
IO_40	IO	2017	Loggerhead	12.3	Stranded	Frag	2.99	2.08	0.56	Clear
IO_46	IO	2017	Loggerhead	9	Stranded	Thr	28.12	0.32	0.32	White
IO_55	IO	2018	Green	31.8	Stranded	She	79.42	44.81	0.01	Clear
IO_55	IO	2018	Green	31.8	Stranded	She	67.73	8.01	0.01	Black
IO_55	IO	2018	Green	31.8	Stranded	She	13.31	10.69	0.02	Black
IO_55	IO	2018	Green	31.8	Stranded	She	14.33	6.78	0.02	Black
IO_55	IO	2018	Green	31.8	Stranded	She	37.29	19.44	0.06	Clear
IO_55	IO	2018	Green	31.8	Stranded	She	21.56	12.1	0.01	Clear
IO_55	IO	2018	Green	31.8	Stranded	Thr	144.46	0.35	0.35	White
IO_55	IO	2018	Green	31.8	Stranded	Poth	58.36	12.96	0.24	Clear
IO_55	IO	2018	Green	31.8	Stranded	She	35.18	10.38	0.03	Clear
IO_55	IO	2018	Green	31.8	Stranded	She	28.5	8.3	0.25	Clear
IO_55	IO	2018	Green	31.8	Stranded	Thr	31.25	0.44	0.44	Orange
IO_55	IO	2018	Green	31.8	Stranded	Frag	32.9	2.94	1.33	White
IO_55	IO	2018	Green	31.8	Stranded	Frag	12.67	9.48	1.69	White
IO_55	IO	2018	Green	31.8	Stranded	Frag	10.87	2.78	2.2	White
IO_55	IO	2018	Green	31.8	Stranded	Frag	14.72	8.79	1.13	White
IO_55	IO	2018	Green	31.8	Stranded	Frag	14.23	10.59	0.72	Clear
IO_22	IO	UNK	Flatback	10.8	Stranded	Poth	25.53	5.21	1.59	Black
PO_33	PO	2018	Green	8.4	Stranded	Frag	5.36	6.75	1.65	White
PO_33	PO	2018	Green	8.4	Stranded	Frag	7.14	3.24	0.79	White
PO_33	PO	2018	Green	8.4	Stranded	Frag	4.75	2.81	0.72	White
PO_33	PO	2018	Green	8.4	Stranded	Frag	5.16	2.42	0.8	Clear
PO_33	PO	2018	Green	8.4	Stranded	Frag	4.59	2.37	1.05	Clear
PO_33	PO	2018	Green	8.4	Stranded	Thr	18.98	0.41	0.41	White
PO_33	PO	2018	Green	8.4	Stranded	Thr	18.3	0.2	0.2	Blue
PO_33	PO	2018	Green	8.4	Stranded	Thr	21.81	0.36	0.36	Blue
PO_34	PO	2018	Loggerhead	11.1	Stranded	Frag	3.91	2.63	1.44	White
PO_40	PO	2018	Green	6.7	Stranded	She	5.61	4.32	0.09	Clear
PO_40	PO	2018	Green	6.7	Stranded	She	6.41	3.12	0.1	White
PO_41	PO	2018	Green	8.4	Stranded	Frag	9.77	5.8	1.11	Clear
PO_41	PO	2018	Green	8.4	Stranded	Thr	18.88	0.11	0.11	Green
PO_41	PO	2018	Green	8.4	Stranded	Frag	9.28	3.27	0.51	Blue
PO_41	PO	2018	Green	8.4	Stranded	Frag	5.36	3.86	1.12	Clear
PO_41	PO	2018	Green	8.4	Stranded	Frag	5.81	3.33	1.83	Clear
PO_41	PO	2018	Green	8.4	Stranded	Frag	6.31	3.45	1.18	White
PO_41	PO	2018	Green	8.4	Stranded	Frag	7.11	5.53	0.83	White
PO_41	PO	2018	Green	8.4	Stranded	Frag	6.29	3.73	1.37	White
PO_41	PO	2018	Green	8.4	Stranded	Frag	4.28	2.71	2.44	Blue
PO_41	PO	2018	Green	8.4	Stranded	Frag	5.57	2.58	1.01	Blue
PO_41	PO	2018	Green	8.4	Stranded	Frag	5.69	4.6	1.69	Blue
PO_41	PO	2018	Green	8.4	Stranded	Frag	3.33	2.36	1.21	Blue
PO_41	PO	2018	Green	8.4	Stranded	Frag	4.69	4.54	1.72	Green
PO_41	PO	2018	Green	8.4	Stranded	Frag	4.85	1.75	1.65	White
PO_41	PO	2018	Green	8.4	Stranded	Frag	4.75	3.3	1.48	Clear
PO_41	PO	2018	Green	8.4	Stranded	Frag	4.68	4.1	0.77	White
PO_41	PO	2018	Green	8.4	Stranded	Frag	5.99	4.44	0.76	White
PO_41	PO	2018	Green	8.4	Stranded	Frag	4.39	2.74	0.87	White
PO_41	PO	2018	Green	8.4	Stranded	Frag	4.55	4.2	2.11	Clear
PO_41	PO	2018	Green	8.4	Stranded	Frag	5.22	3.61	1.72	Clear
PO_41	PO	2018	Green	8.4	Stranded	Frag	3.22	1.47	0.7	White
PO_41	PO	2018	Green	8.4	Stranded	Thr	20.29	0.35	0.35	Blue
PO_41	PO	2018	Green	8.4	Stranded	Thr	11.85	0.32	0.32	Blue
PO_41	PO	2018	Green	8.4	Stranded	Thr	17.09	0.52	0.52	White
PO_41	PO	2018	Green	8.4	Stranded	Thr	10.95	0.53	0.53	Green
PO_41	PO	2018	Green	8.4	Stranded	Thr	6.89	0.22	0.22	Red
PO_41	PO	2018	Green	8.4	Stranded	Thr	14.01	0.27	0.27	White
PO_41	PO	2018	Green	8.4	Stranded	Thr	12.52	0.21	0.21	White
PO_41	PO	2018	Green	8.4	Stranded	Frag	11.52	0.81	0.81	White
PO_41	PO	2018	Green	8.4	Stranded	Frag	4.6	2.56	1.77	White
PO_41	PO	2018	Green	8.4	Stranded	Frag	6.05	3.07	1.09	Clear
PO_41	PO	2018	Green	8.4	Stranded	Frag	3.66	2.76	0.71	White
PO_41	PO	2018	Green	8.4	Stranded	Frag	2.66	1.9	0.72	White
PO_41	PO	2018	Green	8.4	Stranded	Frag	2.7	1.47	0.87	White
PO_41	PO	2018	Green	8.4	Stranded	Frag	2.83	2.51	0.92	Clear
PO_41	PO	2018	Green	8.4	Stranded	Frag	4	1.83	0.18	White
PO_41	PO	2018	Green	8.4	Stranded	Frag	2.03	0.78	0.21	White
PO_41	PO	2018	Green	8.4	Stranded	Frag	1.6	0.98	0.25	White
PO_41	PO	2018	Green	8.4	Stranded	She	6.69	3.72	0.23	White
PO_41	PO	2018	Green	8.4	Stranded	She	6.45	5.61	0.03	Yellow
PO_41	PO	2018	Green	8.4	Stranded	She	14.43	4.33	0.07	Clear
PO_41	PO	2018	Green	8.4	Stranded	She	5.59	5.33	0.14	Clear
PO_41	PO	2018	Green	8.4	Stranded	She	11.46	7.84	0.01	Clear
PO_41	PO	2018	Green	8.4	Stranded	She	9.31	5.24	0.25	Clear
PO_41	PO	2018	Green	8.4	Stranded	She	6	3.82	0.02	White
PO_41	PO	2018	Green	8.4	Stranded	She	14.46	6.09	0.06	Clear
PO_41	PO	2018	Green	8.4	Stranded	She	4.73	2.54	0.04	Blue
PO_41	PO	2018	Green	8.4	Stranded	She	11.49	5.18	0.23	White
PO_41	PO	2018	Green	8.4	Stranded	She	10.73	3.58	0.18	Clear
PO_41	PO	2018	Green	8.4	Stranded	She	13.26	3.64	0.12	Clear
PO_41	PO	2018	Green	8.4	Stranded	She	7.36	4.25	0.03	Clear
PO_41	PO	2018	Green	8.4	Stranded	She	4.88	3.73	0.1	Black
PO_41	PO	2018	Green	8.4	Stranded	She	3.67	2.75	0.06	White
PO_41	PO	2018	Green	8.4	Stranded	Frag	7	3.26	1.33	Red
PO_41	PO	2018	Green	8.4	Stranded	Frag	4.63	3.69	0.8	Clear
PO_41	PO	2018	Green	8.4	Stranded	She	4.18	3.06	0.06	White
PO_41	PO	2018	Green	8.4	Stranded	She	3.48	1.27	1.14	White
PO_41	PO	2018	Green	8.4	Stranded	She	2.95	1.99	0.02	Blue
PO_41	PO	2018	Green	8.4	Stranded	She	2.31	1.36	0.02	Blue
PO_41	PO	2018	Green	8.4	Stranded	She	3.1	2.24	0.02	Clear
PO_41	PO	2018	Green	8.4	Stranded	She	4.09	2.02	0.1	White
PO_41	PO	2018	Green	8.4	Stranded	She	8.63	2.99	0.12	Clear
PO_41	PO	2018	Green	8.4	Stranded	She	14.94	3.04	0.02	Clear
PO_41	PO	2018	Green	8.4	Stranded	Frag	4.25	2.94	0.47	White
PO_41	PO	2018	Green	8.4	Stranded	Frag	3.54	2.85	1.06	Clear
PO_41	PO	2018	Green	8.4	Stranded	Frag	3.97	3.39	0.35	White
PO_41	PO	2018	Green	8.4	Stranded	Frag	3.37	2.41	1.08	White
PO_41	PO	2018	Green	8.4	Stranded	Thr	11.4	1.67	0.45	White
PO_41	PO	2018	Green	8.4	Stranded	Thr	7.7	2.35	0.05	Yellow
PO_41	PO	2018	Green	8.4	Stranded	Thr	5.31	2.37	0.04	Yellow
PO_41	PO	2018	Green	8.4	Stranded	Thr	11.22	0.41	0.41	Red
PO_41	PO	2018	Green	8.4	Stranded	Frag	3.36	2.25	0.71	White
PO_41	PO	2018	Green	8.4	Stranded	Frag	3.23	1.98	1.51	Clear
PO_41	PO	2018	Green	8.4	Stranded	Frag	1.79	1.06	0.55	Clear
PO_41	PO	2018	Green	8.4	Stranded	Frag	2.85	1.78	1.41	White
PO_41	PO	2018	Green	8.4	Stranded	Frag	2.2	1.92	0.97	White
PO_41	PO	2018	Green	8.4	Stranded	Frag	3.79	1.65	0.41	Red
PO_41	PO	2018	Green	8.4	Stranded	Frag	2.24	1.8	0.71	White
PO_41	PO	2018	Green	8.4	Stranded	Frag	2.43	1.98	0.71	White
PO_41	PO	2018	Green	8.4	Stranded	She	3.62	1.59	0.01	Clear
PO_41	PO	2018	Green	8.4	Stranded	She	3.44	2.4	0.01	Clear
PO_41	PO	2018	Green	8.4	Stranded	She	1.96	1.16	0.01	Yellow
PO_41	PO	2018	Green	8.4	Stranded	She	2.45	1.31	0.02	Blue
PO_41	PO	2018	Green	8.4	Stranded	She	6.25	1.92	0.02	Clear
PO_41	PO	2018	Green	8.4	Stranded	Frag	5.03	2.88	0.59	Clear
PO_41	PO	2018	Green	8.4	Stranded	Frag	2.76	1.89	0.81	White
PO_41	PO	2018	Green	8.4	Stranded	Frag	1.4	0.97	0.69	White
PO_41	PO	2018	Green	8.4	Stranded	Frag	1.59	0.83	0.63	White
PO_41	PO	2018	Green	8.4	Stranded	Frag	1.6	0.82	0.64	White
PO_41	PO	2018	Green	8.4	Stranded	Frag	2.05	2.02	1.55	Orange
PO_41	PO	2018	Green	8.4	Stranded	Frag	1.01	0.24	0.86	White
PO_41	PO	2018	Green	8.4	Stranded	Frag	1.58	1.38	0.55	White
PO_39	PO	2018	Loggerhead	7.1	Stranded	Frag	12.71	3.03	2.17	Yellow
PO_39	PO	2018	Loggerhead	7.1	Stranded	Frag	5.52	4.23	0.63	White
PO_39	PO	2018	Loggerhead	7.1	Stranded	Ind	4.03	4.03	1.49	Yellow
PO_39	PO	2018	Loggerhead	7.1	Stranded	Frag	2.82	1.96	1.46	Pink
PO_39	PO	2018	Loggerhead	7.1	Stranded	Frag	3.04	2.54	1.02	White
PO_39	PO	2018	Loggerhead	7.1	Stranded	Frag	3.65	2.55	0.61	White
PO_39	PO	2018	Loggerhead	7.1	Stranded	Frag	2.17	1.92	0.32	White
PO_39	PO	2018	Loggerhead	7.1	Stranded	Frag	1.93	1.14	0.42	White
PO_39	PO	2018	Loggerhead	7.1	Stranded	Frag	4.61	1.17	0.82	Clear
PO_39	PO	2018	Loggerhead	7.1	Stranded	Frag	1.08	0.65	0.31	Blue
PO_39	PO	2018	Loggerhead	7.1	Stranded	Frag	5.86	2.69	0.27	Black
PO_39	PO	2018	Loggerhead	7.1	Stranded	She	6.02	3.03	0.05	White
PO_44	PO	2018	Green	7.9	Stranded	Frag	4.63	2.76	3.2	White
PO_44	PO	2018	Green	7.9	Stranded	Frag	6.63	5	0.95	Clear
PO_44	PO	2018	Green	7.9	Stranded	Frag	3.39	2.31	1.53	White
PO_44	PO	2018	Green	7.9	Stranded	Frag	4.37	2.64	1.03	Clear
PO_44	PO	2018	Green	7.9	Stranded	Frag	3.09	2.61	1.15	Blue
PO_42	PO	2018	Green	8.2	Stranded	Frag	1.49	1.25	0.95	Clear
PO_42	PO	2018	Green	8.2	Stranded	Frag	9.17	5.48	1.47	Pink
PO_42	PO	2018	Green	8.2	Stranded	Frag	5.53	3.76	3.02	Black
PO_42	PO	2018	Green	8.2	Stranded	Frag	8.6	4.81	0.88	White
PO_42	PO	2018	Green	8.2	Stranded	Frag	5.17	2.01	0.98	Yellow
PO_42	PO	2018	Green	8.2	Stranded	Frag	6.69	3.08	1.67	Red
PO_42	PO	2018	Green	8.2	Stranded	Frag	7.45	1.64	1.05	Green
PO_42	PO	2018	Green	8.2	Stranded	Frag	2.19	1.39	0.78	Green
PO_42	PO	2018	Green	8.2	Stranded	Frag	8.82	4.23	0.57	Clear
PO_42	PO	2018	Green	8.2	Stranded	Frag	5.2	3.03	0.86	Clear
PO_42	PO	2018	Green	8.2	Stranded	Frag	3.3	2.6	0.51	Clear
PO_42	PO	2018	Green	8.2	Stranded	Frag	4.84	3.63	1.66	White
PO_42	PO	2018	Green	8.2	Stranded	Frag	4.85	1.99	0.91	White
PO_42	PO	2018	Green	8.2	Stranded	Frag	2.83	2.19	1.63	Pink
PO_42	PO	2018	Green	8.2	Stranded	Frag	3.36	2.22	0.82	Pink/purple
PO_42	PO	2018	Green	8.2	Stranded	Frag	2.82	2.05	1	Clear
PO_42	PO	2018	Green	8.2	Stranded	Frag	2.67	1.17	0.52	Clear
PO_42	PO	2018	Green	8.2	Stranded	Frag	2.35	1.88	0.8	Clear
PO_42	PO	2018	Green	8.2	Stranded	Frag	2.63	2.17	0.9	Clear
PO_42	PO	2018	Green	8.2	Stranded	Frag	1.14	0.9	0.34	Clear
PO_42	PO	2018	Green	8.2	Stranded	Ind	3.59	2.4	2.4	Clear
PO_42	PO	2018	Green	8.2	Stranded	Thr	8.63	0.17	0.17	Green
PO_42	PO	2018	Green	8.2	Stranded	Thr	4.75	0.36	0.36	White
PO_42	PO	2018	Green	8.2	Stranded	She	8.09	2.28	0.04	Clear
PO_42	PO	2018	Green	8.2	Stranded	She	2.32	2.1	0.05	White
PO_43	PO	2018	Loggerhead	5.3	Stranded	Frag	5.66	4.93	1.22	White
PO_43	PO	2018	Loggerhead	5.3	Stranded	Frag	5.24	4.42	2.61	Green
PO_46	PO	2018	Green	10.8	Stranded	Frag	6.73	6.44	0.81	White
PO_46	PO	2018	Green	10.8	Stranded	Frag	4.75	4.13	1.04	Blue
PO_46	PO	2018	Green	10.8	Stranded	Frag	9.44	6.88	1.7	White
PO_46	PO	2018	Green	10.8	Stranded	Frag	7.1	5.3	0.96	Green
PO_46	PO	2018	Green	10.8	Stranded	Frag	11.9	4.79	1.61	Yellow
PO_46	PO	2018	Green	10.8	Stranded	Frag	7.39	4.92	1.22	Pink
PO_46	PO	2018	Green	10.8	Stranded	Frag	8.16	5.45	0.43	Grey
PO_46	PO	2018	Green	10.8	Stranded	Frag	8.06	2.14	1.11	Grey
PO_46	PO	2018	Green	10.8	Stranded	Frag	7.04	5.35	1.26	Brown
PO_46	PO	2018	Green	10.8	Stranded	Frag	13.57	8.03	0.34	Clear
PO_46	PO	2018	Green	10.8	Stranded	Frag	99.6	5.58	0.65	Brown
PO_46	PO	2018	Green	10.8	Stranded	Poth	7.5	4.47	2.28	White
PO_46	PO	2018	Green	10.8	Stranded	Frag	13.2	6.18	0.91	Clear
PO_46	PO	2018	Green	10.8	Stranded	Ind	5.46	3.99	3.99	White
PO_46	PO	2018	Green	10.8	Stranded	Ind	4.93	2.65	2.64	Orange
PO_46	PO	2018	Green	10.8	Stranded	Frag	4.02	2.89	1.06	Yellow
PO_46	PO	2018	Green	10.8	Stranded	Frag	5.74	5.65	1.83	White
PO_46	PO	2018	Green	10.8	Stranded	Frag	10.11	5.84	1.04	White
PO_46	PO	2018	Green	10.8	Stranded	Frag	5.65	4.53	1.92	Brown
PO_46	PO	2018	Green	10.8	Stranded	Frag	7.94	4.21	1.59	White
PO_46	PO	2018	Green	10.8	Stranded	Frag	7.85	5.73	0.59	White
PO_46	PO	2018	Green	10.8	Stranded	Frag	6.58	5.32	2.34	White
PO_46	PO	2018	Green	10.8	Stranded	Frag	7.41	3.9	0.45	Grey
PO_46	PO	2018	Green	10.8	Stranded	Frag	9.95	3.8	2.02	White
PO_46	PO	2018	Green	10.8	Stranded	Frag	6.31	4.6	0.78	White
PO_46	PO	2018	Green	10.8	Stranded	Frag	6.3	4.85	1.36	White
PO_46	PO	2018	Green	10.8	Stranded	Frag	8.38	6.09	0.97	Clear
PO_46	PO	2018	Green	10.8	Stranded	Frag	5.44	4.21	0.78	Pink
PO_46	PO	2018	Green	10.8	Stranded	Frag	5.23	4.95	1.09	Clear
PO_46	PO	2018	Green	10.8	Stranded	Frag	5.26	4.44	3.02	Clear
PO_46	PO	2018	Green	10.8	Stranded	Frag	4.28	4.29	0.95	White
PO_46	PO	2018	Green	10.8	Stranded	Frag	3.65	2.97	1.76	Green
PO_46	PO	2018	Green	10.8	Stranded	Frag	6.25	4.08	0.94	Brown
PO_46	PO	2018	Green	10.8	Stranded	Frag	6.98	3.55	0.69	White
PO_46	PO	2018	Green	10.8	Stranded	Frag	5.38	2.81	1.09	Brown
PO_46	PO	2018	Green	10.8	Stranded	Frag	4.72	3.68	1.03	Clear
PO_46	PO	2018	Green	10.8	Stranded	Frag	7.6	3.32	1.37	White
PO_46	PO	2018	Green	10.8	Stranded	Frag	4.9	5.04	0.93	White
PO_46	PO	2018	Green	10.8	Stranded	Frag	4.29	2.13	2.35	Clear
PO_46	PO	2018	Green	10.8	Stranded	Frag	5.33	5.18	0.9	White
PO_46	PO	2018	Green	10.8	Stranded	Frag	5.05	4.3	1	White
PO_46	PO	2018	Green	10.8	Stranded	Frag	5.17	3.27	1.44	White
PO_46	PO	2018	Green	10.8	Stranded	Frag	5.12	3.65	0.64	Green
PO_46	PO	2018	Green	10.8	Stranded	Frag	5.74	3.64	1.2	White
PO_46	PO	2018	Green	10.8	Stranded	Frag	2.67	2.67	1.55	White
PO_46	PO	2018	Green	10.8	Stranded	Frag	4.54	3.26	1.02	White
PO_46	PO	2018	Green	10.8	Stranded	Frag	3.24	3.24	0.53	White
PO_46	PO	2018	Green	10.8	Stranded	Frag	3.43	2.94	0.6	White
PO_38	PO	2018	Green	40.9	Bycaught	She	66.93	18.78	0.01	Black
PO_38	PO	2018	Green	40.9	Bycaught	Frag	16.87	6.76	1.27	White
PO_38	PO	2018	Green	40.9	Bycaught	Frag	16.97	14.9	1.21	Orange
PO_38	PO	2018	Green	40.9	Bycaught	Frag	14.06	9.47	1.2	Orange
PO_38	PO	2018	Green	40.9	Bycaught	Frag	9.13	7.22	1.01	Blue
PO_38	PO	2018	Green	40.9	Bycaught	Frag	9.11	4.78	1.13	Blue
PO_38	PO	2018	Green	40.9	Bycaught	Frag	12.12	5.11	0.93	Blue
PO_38	PO	2018	Green	40.9	Bycaught	Frag	5.82	2.45	0.85	Blue
PO_38	PO	2018	Green	40.9	Bycaught	Frag	19.28	5.91	3.36	Clear
PO_38	PO	2018	Green	40.9	Bycaught	Frag	14.49	11.56	1.07	Orange
PO_38	PO	2018	Green	40.9	Bycaught	Frag	20.12	6.88	1.9	White
PO_38	PO	2018	Green	40.9	Bycaught	Frag	13.24	8.59	0.52	Blue
PO_38	PO	2018	Green	40.9	Bycaught	Frag	5.89	3.82	0.86	White
PO_38	PO	2018	Green	40.9	Bycaught	Frag	11.98	6.53	3.07	Orange
PO_38	PO	2018	Green	40.9	Bycaught	Frag	11.99	6.05	1.14	Blue
PO_38	PO	2018	Green	40.9	Bycaught	Frag	9.52	6.7	1.11	Blue
PO_38	PO	2018	Green	40.9	Bycaught	Frag	10.35	3.4	1.26	Blue
PO_38	PO	2018	Green	40.9	Bycaught	Frag	9.89	5.91	1.27	Orange
PO_38	PO	2018	Green	40.9	Bycaught	Thr	33.94	0.28	0.28	Green
PO_38	PO	2018	Green	40.9	Bycaught	Thr	28.98	0.21	0.21	Green
PO_38	PO	2018	Green	40.9	Bycaught	Thr	37.8	0.32	0.32	Green
PO_38	PO	2018	Green	40.9	Bycaught	Thr	121.67	0.23	0.23	Green
PO_38	PO	2018	Green	40.9	Bycaught	Thr	63.73	0.3	0.3	Green
PO_38	PO	2018	Green	40.9	Bycaught	Thr	27.49	0.27	0.27	Green
PO_38	PO	2018	Green	40.9	Bycaught	Thr	23.89	0.27	0.27	Green
PO_38	PO	2018	Green	40.9	Bycaught	Frag	24.17	1.78	1.78	Brown
PO_38	PO	2018	Green	40.9	Bycaught	Frag	10.36	6.03	1.02	Blue
PO_38	PO	2018	Green	40.9	Bycaught	Frag	6	4.66	0.96	Blue
PO_38	PO	2018	Green	40.9	Bycaught	Frag	3.66	2.22	1.13	Orange
PO_38	PO	2018	Green	40.9	Bycaught	Frag	20.15	5.15	0.55	White
PO_38	PO	2018	Green	40.9	Bycaught	Frag	13.56	3.55	0.76	White
PO_38	PO	2018	Green	40.9	Bycaught	She	9.03	3.48	0.12	White
PO_38	PO	2018	Green	40.9	Bycaught	She	8.32	3.97	0.22	White
PO_38	PO	2018	Green	40.9	Bycaught	She	14.56	0.88	0.03	Green
PO_38	PO	2018	Green	40.9	Bycaught	She	20.49	2.13	0.05	Green
PO_38	PO	2018	Green	40.9	Bycaught	She	17.15	1.5	0.28	Green
PO_38	PO	2018	Green	40.9	Bycaught	She	15.36	1.92	0.18	Green
PO_38	PO	2018	Green	40.9	Bycaught	She	23.16	1.88	0.15	Green
PO_38	PO	2018	Green	40.9	Bycaught	She	67.64	42.23	0.08	Clear
PO_38	PO	2018	Green	40.9	Bycaught	She	33.06	20.76	0.22	Clear
PO_38	PO	2018	Green	40.9	Bycaught	She	14.19	11.03	0.02	Clear
PO_38	PO	2018	Green	40.9	Bycaught	She	20.76	9.53	0.08	Clear
PO_38	PO	2018	Green	40.9	Bycaught	She	19.3	2.01	0.01	Clear
PO_1	PO	2014	Flatback	10.9	Stranded	Frag	6.35	4.79	0.91	Clear
PO_1	PO	2014	Flatback	10.9	Stranded	Frag	8.61	6.02	0.68	White
PO_1	PO	2014	Flatback	10.9	Stranded	Frag	7.63	5.31	0.78	White
PO_1	PO	2014	Flatback	10.9	Stranded	Frag	5.53	3.42	1.96	White
PO_1	PO	2014	Flatback	10.9	Stranded	She	5.21	5.08	0.3	White
PO_1	PO	2014	Flatback	10.9	Stranded	Thr	0	0	0	White
PO_1	PO	2014	Flatback	10.9	Stranded	Frag	5.24	1.28	0.61	White
PO_1	PO	2014	Flatback	10.9	Stranded	Frag	2.26	0.96	0.62	White
PO_1	PO	2014	Flatback	10.9	Stranded	Frag	2.87	0.75	0.55	White
PO_21	PO	2014	Flatback	8.7	Stranded	Frag	5.3	4.28	0.85	White
PO_21	PO	2014	Flatback	8.7	Stranded	Frag	5.53	3.96	0.81	Clear
PO_21	PO	2014	Flatback	8.7	Stranded	Frag	7.9	3.18	0.84	White
PO_21	PO	2014	Flatback	8.7	Stranded	She	9.36	2.93	0.14	Balck
PO_21	PO	2014	Flatback	8.7	Stranded	Frag	5.13	5.11	1.14	Blue
PO_21	PO	2014	Flatback	8.7	Stranded	Frag	4.93	1.9	0.71	White
PO_21	PO	2014	Flatback	8.7	Stranded	Frag	3.55	2.94	1.04	Clear
PO_21	PO	2014	Flatback	8.7	Stranded	Frag	1.73	1.23	0.67	White
PO_21	PO	2014	Flatback	8.7	Stranded	Frag	0	0	0	Clear
PO_21	PO	2014	Flatback	8.7	Stranded	Frag	0	0	0	Clear
PO_21	PO	2014	Flatback	8.7	Stranded	Frag	0	0	0	Clear
PO_21	PO	2014	Flatback	8.7	Stranded	Frag	0	0	0	Clear
PO_3	PO	2014	Flatback	26.7	Stranded	Foam	9.5	8.92	2.69	Green
PO_3	PO	2014	Flatback	26.7	Stranded	Foam	10.61	5.99	1.77	Green
PO_12	PO	2014	Flatback	10.7	Stranded	Frag	7.74	6.44	1.62	White
PO_12	PO	2014	Flatback	10.7	Stranded	Frag	7.1	5.92	0.82	White
PO_12	PO	2014	Flatback	10.7	Stranded	Frag	6.69	4.29	0.89	White
PO_12	PO	2014	Flatback	10.7	Stranded	Frag	6.89	6.47	0.84	White
PO_12	PO	2014	Flatback	10.7	Stranded	Frag	6.05	3.22	1.11	White
PO_12	PO	2014	Flatback	10.7	Stranded	Frag	5.14	3.77	0.89	White
PO_12	PO	2014	Flatback	10.7	Stranded	Frag	5.52	2.79	0.74	Clear
PO_12	PO	2014	Flatback	10.7	Stranded	Frag	5.31	4.25	0.72	White
PO_12	PO	2014	Flatback	10.7	Stranded	Frag	3.94	3.02	0.92	White
PO_12	PO	2014	Flatback	10.7	Stranded	Frag	0	0	0	Yellow
PO_12	PO	2014	Flatback	10.7	Stranded	Frag	0	0	0	White
PO_12	PO	2014	Flatback	10.7	Stranded	Frag	0	0	0	White
PO_12	PO	2014	Flatback	10.7	Stranded	Frag	0	0	0	White
PO_12	PO	2014	Flatback	10.7	Stranded	Frag	0	0	0	White
PO_12	PO	2014	Flatback	10.7	Stranded	Frag	3.88	2.29	0.69	White
PO_12	PO	2014	Flatback	10.7	Stranded	Frag	5.09	3.77	0.68	White
PO_12	PO	2014	Flatback	10.7	Stranded	Frag	4.04	2.66	0.68	White
PO_12	PO	2014	Flatback	10.7	Stranded	Frag	4.55	3.56	0.71	White
PO_2	PO	2011	Flatback	9.1	Stranded	Frag	5.37	4.34	0.61	Yellow
PO_2	PO	2011	Flatback	9.1	Stranded	Frag	3.83	1.79	0.59	Clear
PO_2	PO	2011	Flatback	9.1	Stranded	Frag	6.16	4.18	0.87	White
PO_2	PO	2011	Flatback	9.1	Stranded	She	0	0	0	White
PO_2	PO	2011	Flatback	9.1	Stranded	Frag	4.26	1.85	0.8	White
PO_2	PO	2011	Flatback	9.1	Stranded	Frag	0	0	0	Clear
PO_2	PO	2011	Flatback	9.1	Stranded	She	0	0	0	White
PO_15	PO	2011	Green	8.5	Stranded	She	7.32	5.49	0.06	Clear
PO_15	PO	2011	Green	8.5	Stranded	Frag	5.74	2.93	0.67	White
PO_15	PO	2011	Green	8.5	Stranded	Frag	5.29	2.56	1.5	White
PO_15	PO	2011	Green	8.5	Stranded	Frag	4.44	3.82	1.03	Clear
PO_15	PO	2011	Green	8.5	Stranded	Frag	3.27	3.17	0.9	White
PO_15	PO	2011	Green	8.5	Stranded	Frag	3.92	1.45	0.48	Clear
PO_15	PO	2011	Green	8.5	Stranded	Frag	5.27	1.93	0.77	White
PO_15	PO	2011	Green	8.5	Stranded	She	0	0	0	Blue
PO_15	PO	2011	Green	8.5	Stranded	Frag	0	0	0	Clear
PO_15	PO	2011	Green	8.5	Stranded	Frag	0	0	0	White
PO_18	PO	2014	Green	7.4	Stranded	Frag	3.65	2.15	1.02	Blue
PO_18	PO	2014	Green	7.4	Stranded	She	7.45	2.26	0.04	Blue
PO_18	PO	2014	Green	7.4	Stranded	Frag	7.33	4.93	0.42	Clear
PO_18	PO	2014	Green	7.4	Stranded	Frag	5.13	3.12	1.51	Blue
PO_18	PO	2014	Green	7.4	Stranded	Frag	6.78	4.77	1.12	White
PO_18	PO	2014	Green	7.4	Stranded	Frag	3.53	2.51	0.45	Red
PO_18	PO	2014	Green	7.4	Stranded	Frag	4.24	3.67	1.18	Clear
PO_18	PO	2014	Green	7.4	Stranded	Frag	3.35	2.36	1.11	Clear
PO_18	PO	2014	Green	7.4	Stranded	She	9.78	2.82	0.03	Blue
PO_18	PO	2014	Green	7.4	Stranded	Frag	3.36	1.8	0.86	White
PO_18	PO	2014	Green	7.4	Stranded	Frag	2.89	0.59	0.59	Orange
PO_19	PO	2014	Loggerhead	5.8	Stranded	Frag	5.24	3.59	0.79	White
PO_23	PO	2014	Green	6.3	Stranded	She	9.96	3.03	0.04	Blue
PO_23	PO	2014	Green	6.3	Stranded	Frag	0	0	0	Orange
PO_20	PO	2014	Flatback	10.1	Stranded	She	8.12	4.78	0.04	Clear
PO_20	PO	2014	Flatback	10.1	Stranded	She	15.8	1.97	0.06	Blue
PO_20	PO	2014	Flatback	10.1	Stranded	Frag	6.65	4.55	0.62	White
PO_20	PO	2014	Flatback	10.1	Stranded	Frag	4.21	3.53	0.7	White
PO_20	PO	2014	Flatback	10.1	Stranded	Frag	8.37	3.76	2.74	White
PO_20	PO	2014	Flatback	10.1	Stranded	She	11.32	6.63	0.04	Clear
PO_20	PO	2014	Flatback	10.1	Stranded	Frag	8.09	7.77	0.88	White
PO_20	PO	2014	Flatback	10.1	Stranded	Frag	7.72	4.68	1.09	Blue
PO_20	PO	2014	Flatback	10.1	Stranded	She	10.3	7.1	0.03	White
PO_20	PO	2014	Flatback	10.1	Stranded	She	5.68	3.01	0.03	White
PO_64	PO	UNK	Flatback	14.8	Stranded	Frag	7.77	5.04	2.74	Yellow
PO_64	PO	UNK	Flatback	14.8	Stranded	She	10.28	3.48	2.07	White
PO_64	PO	UNK	Flatback	14.8	Stranded	She	10.61	3.72	0.11	White
PO_64	PO	UNK	Flatback	14.8	Stranded	She	5.25	3.79	0.06	Brown
PO_64	PO	UNK	Flatback	14.8	Stranded	Frag	5.94	2.67	1.21	White
PO_64	PO	UNK	Flatback	14.8	Stranded	Frag	6.39	3.12	0.87	White
PO_13	PO	1993	Green	11.6	Stranded	Frag	4.81	3.01	0.49	Black
PO_11	PO	2004	Green	24	Stranded	Frag	9.7	7.89	1.46	Yellow
PO_11	PO	2004	Green	24	Stranded	She	35.77	8.77	0.01	Black
PO_11	PO	2004	Green	24	Stranded	Frag	8.51	6.19	0.75	Green
PO_11	PO	2004	Green	24	Stranded	Frag	8.08	7.55	0.58	Clear
PO_11	PO	2004	Green	24	Stranded	Frag	7.08	4.58	1.31	White
PO_11	PO	2004	Green	24	Stranded	Frag	9.81	3.25	0.999	White
PO_11	PO	2004	Green	24	Stranded	Frag	6.97	5.19	0.96	Yellow
PO_11	PO	2004	Green	24	Stranded	She	15.68	8.48	0.04	Black
PO_11	PO	2004	Green	24	Stranded	Frag	13.88	5.87	1.5	White
PO_11	PO	2004	Green	24	Stranded	Frag	14.35	7.5	2.03	Clear
PO_11	PO	2004	Green	24	Stranded	She	20.24	12.73	0.05	Black
PO_11	PO	2004	Green	24	Stranded	She	15.05	3.11	0.05	Black
PO_11	PO	2004	Green	24	Stranded	She	19.83	4.92	0.05	Black
PO_11	PO	2004	Green	24	Stranded	She	24.86	18.63	0.05	Clear
PO_11	PO	2004	Green	24	Stranded	Ind	4.25	2.88	2.88	Yellow
PO_11	PO	2004	Green	24	Stranded	Frag	5.36	4.96	0.94	Clear
PO_11	PO	2004	Green	24	Stranded	Frag	3.78	3.52	1.17	Clear
PO_11	PO	2004	Green	24	Stranded	Frag	3.92	2.51	0.68	White
PO_11	PO	2004	Green	24	Stranded	Frag	5.11	2.51	1.09	Yellow
PO_11	PO	2004	Green	24	Stranded	Frag	3.99	2.67	1.06	Yellow
PO_11	PO	2004	Green	24	Stranded	Frag	0	0	0	Yellow
PO_27	PO	2017	Olive Ridley	48.8	Bycaught	Frag	6.99	4.05	1.67	White
PO_27	PO	2017	Olive Ridley	48.8	Bycaught	Frag	16.95	8.94	2.08	Clear
PO_27	PO	2017	Olive Ridley	48.8	Bycaught	Frag	18.44	11.93	0.85	Pink
PO_28	PO	2017	Olive Ridley	46.9	Bycaught	Frag	10.84	9.1	1.47	Clear
PO_28	PO	2017	Olive Ridley	46.9	Bycaught	Frag	12.87	6.07	1.3	Clear
PO_28	PO	2017	Olive Ridley	46.9	Bycaught	Frag	16.58	9.71	1.21	Clear
PO_28	PO	2017	Olive Ridley	46.9	Bycaught	Frag	13.39	6.21	1.22	Clear
PO_28	PO	2017	Olive Ridley	46.9	Bycaught	Frag	9.21	3.34	3.18	White
PO_28	PO	2017	Olive Ridley	46.9	Bycaught	Frag	10.54	9.55	1.3	Clear
PO_28	PO	2017	Olive Ridley	46.9	Bycaught	Frag	19.25	12.26	1.55	White
PO_28	PO	2017	Olive Ridley	46.9	Bycaught	Frag	10.38	7.28	2.54	White
PO_28	PO	2017	Olive Ridley	46.9	Bycaught	Frag	11.05	9.68	3.23	White
PO_28	PO	2017	Olive Ridley	46.9	Bycaught	Frag	12.7	6.28	1.97	Clear
PO_28	PO	2017	Olive Ridley	46.9	Bycaught	Frag	9.79	4.08	3.52	Clear
PO_28	PO	2017	Olive Ridley	46.9	Bycaught	Frag	14.54	4.56	2.39	White
PO_28	PO	2017	Olive Ridley	46.9	Bycaught	Frag	20.03	11.27	1.06	Clear
PO_28	PO	2017	Olive Ridley	46.9	Bycaught	Frag	32.31	9.51	1.21	White
PO_28	PO	2017	Olive Ridley	46.9	Bycaught	Frag	15.87	8.4	3.15	White
PO_28	PO	2017	Olive Ridley	46.9	Bycaught	Frag	7.73	6.64	3.31	White
PO_28	PO	2017	Olive Ridley	46.9	Bycaught	Frag	6.83	5.16	0.98	Clear
PO_28	PO	2017	Olive Ridley	46.9	Bycaught	Frag	14.17	5.83	0.93	White
PO_28	PO	2017	Olive Ridley	46.9	Bycaught	Frag	7.38	4.76	1.52	White
PO_28	PO	2017	Olive Ridley	46.9	Bycaught	Frag	10.82	6.27	1.52	White
PO_28	PO	2017	Olive Ridley	46.9	Bycaught	Frag	9.44	3.55	1.65	White
PO_28	PO	2017	Olive Ridley	46.9	Bycaught	Frag	4.83	4.07	2.61	White
PO_28	PO	2017	Olive Ridley	46.9	Bycaught	Frag	6.41	5.01	2.13	White
PO_28	PO	2017	Olive Ridley	46.9	Bycaught	Frag	6.27	2.22	2.13	White
PO_28	PO	2017	Olive Ridley	46.9	Bycaught	Frag	4.91	3.41	0.78	White
PO_28	PO	2017	Olive Ridley	46.9	Bycaught	Poth	12.68	8.52	1.35	Yellow
PO_25	PO	2017	Green	6.4	Stranded	Frag	2.87	2.11	1.34	White
PO_25	PO	2017	Green	6.4	Stranded	Frag	2.22	1.11	1.98	White
PO_25	PO	2017	Green	6.4	Stranded	Thr	16.92	9.27	9.27	Green
PO_29	PO	2017	Green	6.4	Stranded	Frag	5.51	3.97	1.13	White
PO_29	PO	2017	Green	6.4	Stranded	Frag	4.13	2.47	0.54	Blue
PO_29	PO	2017	Green	6.4	Stranded	Frag	4.51	2.54	1.02	White
PO_29	PO	2017	Green	6.4	Stranded	Frag	4.63	2.74	0.69	White
PO_29	PO	2017	Green	6.4	Stranded	She	4.95	2.4	0.12	White
PO_29	PO	2017	Green	6.4	Stranded	Frag	3.7	2.38	2.01	White
PO_29	PO	2017	Green	6.4	Stranded	Frag	5.31	2.9	0.82	White
PO_29	PO	2017	Green	6.4	Stranded	Frag	4.3	1.63	0.69	White
PO_31	PO	2017	Green	43.6	Bycaught	Frag	14.97	6.34	3.66	White
PO_31	PO	2017	Green	43.6	Bycaught	Frag	14.49	7.71	3.65	White
PO_31	PO	2017	Green	43.6	Bycaught	Frag	10.56	5.6	1.97	White
PO_31	PO	2017	Green	43.6	Bycaught	Frag	6.41	3.6	1.97	White
PO_31	PO	2017	Green	43.6	Bycaught	Frag	7.92	6.32	0.95	Black
PO_31	PO	2017	Green	43.6	Bycaught	Frag	8.81	6.43	1.64	Green
PO_31	PO	2017	Green	43.6	Bycaught	Frag	6.47	2.32	0.98	Black
PO_31	PO	2017	Green	43.6	Bycaught	She	50.57	26.89	0.02	Yellow
PO_31	PO	2017	Green	43.6	Bycaught	She	153.6	22.97	0.02	Yellow
PO_31	PO	2017	Green	43.6	Bycaught	She	46.29	11.34	0.03	Yellow
PO_31	PO	2017	Green	43.6	Bycaught	She	22.47	14.16	0.01	Clear
PO_31	PO	2017	Green	43.6	Bycaught	She	104.71	17.32	0.12	Black
PO_31	PO	2017	Green	43.6	Bycaught	She	13.37	6.78	0.14	Green
PO_31	PO	2017	Green	43.6	Bycaught	Frag	11.84	7.26	0.48	Clear
PO_31	PO	2017	Green	43.6	Bycaught	Poth	24.94	10.8	0.3	White
PO_31	PO	2017	Green	43.6	Bycaught	Poth	14.23	9.06	0.55	Yellow
PO_31	PO	2017	Green	43.6	Bycaught	Thr	245.88	0.36	0.36	Green
PO_31	PO	2017	Green	43.6	Bycaught	Thr	37.79	14.06	1.31	Green
PO_31	PO	2017	Green	43.6	Bycaught	Thr	45.81	40.04	0.21	Green
PO_31	PO	2017	Green	43.6	Bycaught	Thr	44.31	16.17	0.38	Green
PO_31	PO	2017	Green	43.6	Bycaught	Thr	66.22	11.01	0.31	Green
PO_31	PO	2017	Green	43.6	Bycaught	Thr	51.52	19.02	0.47	Green
PO_30	PO	2017	Green	41.5	Bycaught	Frag	9.21	7.25	0.9	White
PO_30	PO	2017	Green	41.5	Bycaught	Frag	8.71	2.84	0.86	White
PO_30	PO	2017	Green	41.5	Bycaught	Frag	7.58	3.6	0.84	White
PO_30	PO	2017	Green	41.5	Bycaught	Thr	17.8	15.32	3.21	Green
PO_30	PO	2017	Green	41.5	Bycaught	She	114.75	70.05	0.02	Clear
PO_30	PO	2017	Green	41.5	Bycaught	She	84.1	64.09	0.18	Clear
PO_30	PO	2017	Green	41.5	Bycaught	She	36.22	14.83	0.19	Clear
PO_30	PO	2017	Green	41.5	Bycaught	She	108.58	71.09	0.02	Clear
PO_30	PO	2017	Green	41.5	Bycaught	She	168.17	66.14	0.05	Clear
PO_30	PO	2017	Green	41.5	Bycaught	She	53.47	20.3	0.11	Clear
PO_30	PO	2017	Green	41.5	Bycaught	She	52.4	16.4	0.13	Clear
PO_30	PO	2017	Green	41.5	Bycaught	She	139.22	28.41	0.13	Clear
PO_30	PO	2017	Green	41.5	Bycaught	She	33.88	12.3	0.13	Clear
PO_30	PO	2017	Green	41.5	Bycaught	She	80.6	30.45	0.4	Clear
PO_30	PO	2017	Green	41.5	Bycaught	She	117.9	39.02	0.02	Clear
PO_30	PO	2017	Green	41.5	Bycaught	She	47.32	21.27	0.14	Clear
PO_30	PO	2017	Green	41.5	Bycaught	She	68.76	25.74	0.09	Clear
PO_30	PO	2017	Green	41.5	Bycaught	She	2.21	1.51	0.24	Green
PO_26	PO	2015	Loggerhead	13.9	Stranded	Frag	10.23	8.96	1.02	White
PO_7	PO	2016	Green	57.1	Bycaught	She	177.21	51.66	0.03	Clear
PO_7	PO	2016	Green	57.1	Bycaught	She	242.77	54.48	0.04	Clear
PO_7	PO	2016	Green	57.1	Bycaught	She	307.2	82.93	0.05	Black
PO_7	PO	2016	Green	57.1	Bycaught	She	329.73	44.87	0.06	Black
PO_7	PO	2016	Green	57.1	Bycaught	She	115.35	56.13	0.16	Clear
PO_7	PO	2016	Green	57.1	Bycaught	She	146.32	43.66	0.17	Clear
PO_7	PO	2016	Green	57.1	Bycaught	She	143.72	33.29	0.08	Clear
PO_7	PO	2016	Green	57.1	Bycaught	She	92.97	36.83	0.17	Clear
PO_7	PO	2016	Green	57.1	Bycaught	She	51.01	36.15	0.04	Clear
PO_7	PO	2016	Green	57.1	Bycaught	She	86.92	30.84	0.33	Clear
PO_7	PO	2016	Green	57.1	Bycaught	She	83.55	39.18	0.08	Clear
PO_7	PO	2016	Green	57.1	Bycaught	Frag	40.34	29.45	1.24	Clear
PO_7	PO	2016	Green	57.1	Bycaught	She	61.7	42.51	0.03	Clear
PO_7	PO	2016	Green	57.1	Bycaught	Foam	26.43	20.69	3	Yellow
PO_7	PO	2016	Green	57.1	Bycaught	She	15.98	14.01	0.05	Clear
PO_7	PO	2016	Green	57.1	Bycaught	She	20.44	16.06	0.03	Clear
PO_7	PO	2016	Green	57.1	Bycaught	She	15.43	11.96	0.04	Clear
PO_7	PO	2016	Green	57.1	Bycaught	She	20.37	9.39	0.05	Clear
PO_7	PO	2016	Green	57.1	Bycaught	She	32.39	15.47	0.06	Clear
PO_7	PO	2016	Green	57.1	Bycaught	She	35.4	20.86	0.06	Clear
PO_7	PO	2016	Green	57.1	Bycaught	She	51.64	32.9	0.08	Clear
PO_7	PO	2016	Green	57.1	Bycaught	She	27.14	21.62	0.06	Clear
PO_7	PO	2016	Green	57.1	Bycaught	She	50.34	32.87	0.82	Clear
PO_7	PO	2016	Green	57.1	Bycaught	She	54.3	10.02	0.02	Clear
PO_7	PO	2016	Green	57.1	Bycaught	She	25.98	9.91	0.06	Clear
PO_7	PO	2016	Green	57.1	Bycaught	She	25.69	19.91	0.06	Clear
PO_7	PO	2016	Green	57.1	Bycaught	She	19.89	14.32	0.04	Clear
PO_7	PO	2016	Green	57.1	Bycaught	She	28.54	22.4	0.01	Clear
PO_7	PO	2016	Green	57.1	Bycaught	She	21	13.03	0.02	Clear
PO_7	PO	2016	Green	57.1	Bycaught	Frag	30.67	11.77	2.13	Pink
PO_7	PO	2016	Green	57.1	Bycaught	Foam	28.02	21.23	1.31	Yellow
PO_7	PO	2016	Green	57.1	Bycaught	Foam	22.44	11.06	2.93	Yellow
PO_7	PO	2016	Green	57.1	Bycaught	She	29.98	16.27	0.04	Clear
PO_7	PO	2016	Green	57.1	Bycaught	She	13.53	10.84	0.04	Clear
PO_7	PO	2016	Green	57.1	Bycaught	Frag	21.58	12.08	0.96	Orange
PO_7	PO	2016	Green	57.1	Bycaught	She	21.67	7.79	0.05	Clear
PO_7	PO	2016	Green	57.1	Bycaught	She	29.26	17.31	0.05	Clear
PO_7	PO	2016	Green	57.1	Bycaught	She	35	27.31	0.1	Clear
PO_7	PO	2016	Green	57.1	Bycaught	She	35.51	24.51	0.1	Clear
PO_7	PO	2016	Green	57.1	Bycaught	She	40.04	9.5	0.07	White
PO_7	PO	2016	Green	57.1	Bycaught	Foam	25.26	8.88	1.84	Yellow
PO_7	PO	2016	Green	57.1	Bycaught	She	50.73	30.09	0.18	Clear
PO_7	PO	2016	Green	57.1	Bycaught	She	71.11	14.63	0.03	Clear
PO_7	PO	2016	Green	57.1	Bycaught	She	36.66	26.39	0.06	Clear
PO_7	PO	2016	Green	57.1	Bycaught	She	23.85	21.41	0.03	Clear
PO_7	PO	2016	Green	57.1	Bycaught	She	48.35	36	0.11	Clear
PO_7	PO	2016	Green	57.1	Bycaught	She	40.09	25.47	0.04	Clear
PO_7	PO	2016	Green	57.1	Bycaught	She	59.32	24.03	0.08	Clear
PO_7	PO	2016	Green	57.1	Bycaught	She	46.05	33.05	0.08	Clear
PO_7	PO	2016	Green	57.1	Bycaught	Foam	24.26	19.32	1.88	Yellow
PO_7	PO	2016	Green	57.1	Bycaught	She	49.6	21.83	0.08	Clear
PO_7	PO	2016	Green	57.1	Bycaught	Thr	27.41	1.05	1.05	White
PO_7	PO	2016	Green	57.1	Bycaught	She	61.38	27.51	0.1	Clear
PO_7	PO	2016	Green	57.1	Bycaught	She	38.28	12.23	0.1	Clear
PO_7	PO	2016	Green	57.1	Bycaught	She	20.45	28.6	0.14	Clear
PO_7	PO	2016	Green	57.1	Bycaught	She	58.13	28.41	0.08	Clear
PO_7	PO	2016	Green	57.1	Bycaught	She	33.16	19.62	0.15	Clear
PO_7	PO	2016	Green	57.1	Bycaught	She	27.38	10.85	0.07	Clear
PO_7	PO	2016	Green	57.1	Bycaught	She	34.67	23.87	0.18	Clear
PO_7	PO	2016	Green	57.1	Bycaught	She	20.97	16.75	0.05	Clear
PO_7	PO	2016	Green	57.1	Bycaught	She	30.79	25.58	0.08	Clear
PO_7	PO	2016	Green	57.1	Bycaught	She	20.78	14.01	0.05	Clear
PO_7	PO	2016	Green	57.1	Bycaught	She	18.66	11.31	0.03	Clear
PO_7	PO	2016	Green	57.1	Bycaught	Foam	23.92	11.11	1.19	Yellow
PO_7	PO	2016	Green	57.1	Bycaught	She	12.89	8.74	0.03	Clear
PO_7	PO	2016	Green	57.1	Bycaught	She	36.1	21.15	0.05	Clear
PO_7	PO	2016	Green	57.1	Bycaught	She	19.9	12.46	0.08	Clear
PO_7	PO	2016	Green	57.1	Bycaught	She	17.8	10.41	0.04	Clear
PO_7	PO	2016	Green	57.1	Bycaught	She	13.57	7.16	0.06	White
PO_7	PO	2016	Green	57.1	Bycaught	She	14.38	7.56	0.04	White
PO_7	PO	2016	Green	57.1	Bycaught	She	48.87	29.68	0.09	Clear
PO_7	PO	2016	Green	57.1	Bycaught	She	18.22	11.88	0.08	Clear
PO_7	PO	2016	Green	57.1	Bycaught	She	25.3	11.87	0.1	Clear
PO_7	PO	2016	Green	57.1	Bycaught	She	20.32	10.54	0.09	Clear
PO_7	PO	2016	Green	57.1	Bycaught	Foam	21.85	6.71	1.95	Yellow
PO_7	PO	2016	Green	57.1	Bycaught	She	36.9	18.03	0.09	Clear
PO_7	PO	2016	Green	57.1	Bycaught	She	42.16	20.34	0.03	Clear
PO_7	PO	2016	Green	57.1	Bycaught	She	20.32	12.02	0.03	Clear
PO_7	PO	2016	Green	57.1	Bycaught	She	27.75	16.92	0.06	Clear
PO_7	PO	2016	Green	57.1	Bycaught	She	22.25	16.34	0.07	Clear
PO_7	PO	2016	Green	57.1	Bycaught	Frag	26.18	16.23	1.03	Orange
PO_7	PO	2016	Green	57.1	Bycaught	Frag	19.52	7.51	0.64	Green
PO_7	PO	2016	Green	57.1	Bycaught	She	17.04	8.86	0.03	Clear
PO_7	PO	2016	Green	57.1	Bycaught	She	11.69	6.24	0.03	White
PO_7	PO	2016	Green	57.1	Bycaught	She	16.74	8.99	0.09	Clear
PO_7	PO	2016	Green	57.1	Bycaught	She	17.95	10.92	0.02	Clear
PO_7	PO	2016	Green	57.1	Bycaught	She	11.82	7.85	0.02	Clear
PO_7	PO	2016	Green	57.1	Bycaught	She	13.7	10.21	0.04	Clear
PO_7	PO	2016	Green	57.1	Bycaught	She	21.57	14.67	0.11	Clear
PO_7	PO	2016	Green	57.1	Bycaught	She	22.06	9.31	0.03	Clear
PO_7	PO	2016	Green	57.1	Bycaught	She	16.57	10.52	0.27	Clear
PO_7	PO	2016	Green	57.1	Bycaught	She	15.59	12.25	0.14	Clear
PO_7	PO	2016	Green	57.1	Bycaught	She	12.09	5.63	0.03	Clear
PO_7	PO	2016	Green	57.1	Bycaught	She	14.64	12.91	0.05	Clear
PO_7	PO	2016	Green	57.1	Bycaught	She	10.01	9.16	0.13	Clear
PO_7	PO	2016	Green	57.1	Bycaught	She	11.34	10.8	0.02	Clear
PO_7	PO	2016	Green	57.1	Bycaught	She	18.59	17.45	0.01	Clear
PO_7	PO	2016	Green	57.1	Bycaught	She	19.72	16.1	0.08	Clear
PO_7	PO	2016	Green	57.1	Bycaught	She	16.71	15.72	0.07	Clear
PO_7	PO	2016	Green	57.1	Bycaught	She	21.15	9.66	0.07	Clear
PO_7	PO	2016	Green	57.1	Bycaught	She	9.65	8.67	0.02	Clear
PO_7	PO	2016	Green	57.1	Bycaught	She	9.98	8.84	0.03	Clear
PO_7	PO	2016	Green	57.1	Bycaught	Frag	11.44	10.3	1.2	White
PO_7	PO	2016	Green	57.1	Bycaught	She	16.37	10.77	0.05	Clear
PO_7	PO	2016	Green	57.1	Bycaught	She	35.5	6.7	0.08	Clear
PO_7	PO	2016	Green	57.1	Bycaught	She	13.13	11.54	0.26	Clear
PO_7	PO	2016	Green	57.1	Bycaught	She	12.12	9.17	0.03	Clear
PO_7	PO	2016	Green	57.1	Bycaught	She	12.89	8.67	0.05	Clear
PO_7	PO	2016	Green	57.1	Bycaught	She	15.79	7.77	0.03	Clear
PO_7	PO	2016	Green	57.1	Bycaught	She	17.45	5.55	0.03	Clear
PO_7	PO	2016	Green	57.1	Bycaught	She	17.28	9.98	0.07	Clear
PO_7	PO	2016	Green	57.1	Bycaught	She	16.87	11.84	0.07	Clear
PO_7	PO	2016	Green	57.1	Bycaught	She	16.45	11.75	0.08	Clear
PO_7	PO	2016	Green	57.1	Bycaught	She	22.03	9.42	0.05	Clear
PO_7	PO	2016	Green	57.1	Bycaught	She	9.71	8.63	0.08	Clear
PO_7	PO	2016	Green	57.1	Bycaught	She	20.04	5.95	0.09	Clear
PO_7	PO	2016	Green	57.1	Bycaught	She	17.43	4.7	0.04	Clear
PO_7	PO	2016	Green	57.1	Bycaught	She	10.46	4.28	0.11	Clear
PO_7	PO	2016	Green	57.1	Bycaught	Frag	10.19	7.05	0.92	Orange
PO_7	PO	2016	Green	57.1	Bycaught	Frag	16.77	8.67	0.02	Clear
PO_7	PO	2016	Green	57.1	Bycaught	She	11.17	7.36	0.08	Clear
PO_7	PO	2016	Green	57.1	Bycaught	She	9.38	6.68	0.03	Clear
PO_7	PO	2016	Green	57.1	Bycaught	She	12.05	6.63	0.03	Clear
PO_7	PO	2016	Green	57.1	Bycaught	She	10.31	7.31	0.07	Clear
PO_7	PO	2016	Green	57.1	Bycaught	She	10.71	8.87	0.04	Clear
PO_7	PO	2016	Green	57.1	Bycaught	She	12.34	7.12	0.05	Clear
PO_7	PO	2016	Green	57.1	Bycaught	She	10.19	4.53	0.04	Clear
PO_7	PO	2016	Green	57.1	Bycaught	She	15.1	4.93	0.04	Clear
PO_7	PO	2016	Green	57.1	Bycaught	She	0	0	0	Clear
PO_7	PO	2016	Green	57.1	Bycaught	She	0	0	0	Clear
PO_7	PO	2016	Green	57.1	Bycaught	She	0	0	0	Clear
PO_7	PO	2016	Green	57.1	Bycaught	She	0	0	0	Clear
PO_7	PO	2016	Green	57.1	Bycaught	She	0	0	0	Clear
PO_7	PO	2016	Green	57.1	Bycaught	Frag	0	0	0	Yellow
PO_7	PO	2016	Green	57.1	Bycaught	She	0	0	0	White
PO_7	PO	2016	Green	57.1	Bycaught	She	0	0	0	Clear
PO_7	PO	2016	Green	57.1	Bycaught	She	0	0	0	Clear
PO_7	PO	2016	Green	57.1	Bycaught	She	0	0	0	Clear
PO_7	PO	2016	Green	57.1	Bycaught	She	0	0	0	Clear
PO_7	PO	2016	Green	57.1	Bycaught	She	0	0	0	Clear
PO_7	PO	2016	Green	57.1	Bycaught	She	0	0	0	Clear
PO_7	PO	2016	Green	57.1	Bycaught	She	0	0	0	Clear
PO_7	PO	2016	Green	57.1	Bycaught	She	0	0	0	Clear
PO_7	PO	2016	Green	57.1	Bycaught	She	0	0	0	Clear
PO_7	PO	2016	Green	39.3	Bycaught	She	149.67	89.58	0.06	Clear
PO_7	PO	2016	Green	39.3	Bycaught	She	117.4	29.19	0.05	Clear
PO_7	PO	2016	Green	39.3	Bycaught	Thr	31.3	0.84	0.84	Clear
PO_7	PO	2016	Green	39.3	Bycaught	Thr	18.29	1.11	1.11	Green
PO_7	PO	2016	Green	39.3	Bycaught	Thr	13.69	0.22	0.22	Green
PO_7	PO	2016	Green	41.5	Bycaught	She	54.59	24.39	0.02	Black
PO_7	PO	2016	Green	41.5	Bycaught	She	5.57	4.25	0.01	Clear
PO_7	PO	2016	Green	41.5	Bycaught	Frag	11.76	10.85	0.77	White
PO_7	PO	2016	Green	41.5	Bycaught	Frag	8.26	5.63	2.66	White
PO_7	PO	2016	Green	41.5	Bycaught	She	18.91	14.82	0.1	Black
PO_7	PO	2016	Green	41.5	Bycaught	She	20.19	8.85	0.14	Black
PO_7	PO	2016	Green	41.5	Bycaught	She	80.79	31.72	0.1	White
PO_7	PO	2016	Green	41.5	Bycaught	She	28.64	16.91	0.03	Clear
PO_7	PO	2016	Green	41.5	Bycaught	She	46.08	26.4	0.04	Black
PO_7	PO	2016	Green	41.5	Bycaught	Poth	30.29	17.2	0.71	Pink
PO_16	PO	1996	Green	6.9	Stranded	Frag	4.49	3.77	1.5	Yellow
PO_16	PO	1996	Green	6.9	Stranded	Frag	4.29	2.59	1.48	Yellow
PO_16	PO	1996	Green	6.9	Stranded	Frag	0	0	0	White
PO_24	PO	1994	Green	9.2	Stranded	Frag	3.45	2.89	2.61	Yellow
PO_5	PO	2011	Green	40.5	Bycaught	She	214.37	64.2	0.02	Clear
PO_5	PO	2011	Green	40.5	Bycaught	She	123.54	55.74	0.01	Clear
PO_5	PO	2011	Green	40.5	Bycaught	She	74.75	51.7	0.05	Clear
PO_5	PO	2011	Green	40.5	Bycaught	She	16.75	13.29	0.08	White
PO_5	PO	2011	Green	40.5	Bycaught	She	23.17	11.44	0.14	White
PO_5	PO	2011	Green	40.5	Bycaught	She	18.85	14.33	0.15	Clear
PO_5	PO	2011	Green	40.5	Bycaught	She	21.72	17.7	0.08	Clear
PO_5	PO	2011	Green	40.5	Bycaught	She	29.35	18.19	0.35	Clear
PO_5	PO	2011	Green	40.5	Bycaught	She	62.05	23.59	0.1	Black
PO_5	PO	2011	Green	40.5	Bycaught	She	51.71	26.49	0.03	Black
PO_5	PO	2011	Green	40.5	Bycaught	She	48.97	29.89	0.11	Clear
PO_5	PO	2011	Green	40.5	Bycaught	She	37.6	22.95	0.03	Clear
PO_5	PO	2011	Green	40.5	Bycaught	She	17.55	7.78	0.31	Black
PO_5	PO	2011	Green	40.5	Bycaught	She	12.3	2.56	0.03	White
PO_5	PO	2011	Green	40.5	Bycaught	She	6.35	29.1	0.11	White
PO_5	PO	2011	Green	40.5	Bycaught	She	15.88	7	0.04	Clear
PO_5	PO	2011	Green	40.5	Bycaught	She	9.37	4.28	0.17	White
PO_5	PO	2011	Green	40.5	Bycaught	Frag	6.8	6.06	0.73	White
PO_5	PO	2011	Green	40.5	Bycaught	Frag	12.66	7.89	0.93	Clear
PO_5	PO	2011	Green	40.5	Bycaught	Frag	17.19	3.84	1.37	Green
PO_5	PO	2011	Green	40.5	Bycaught	Thr	140.11	0.13	0.13	White
PO_5	PO	2011	Green	40.5	Bycaught	Thr	136.19	0.31	0.31	White
PO_5	PO	2011	Green	40.5	Bycaught	Thr	61.68	0.2	0.2	Orange
PO_6	PO	2011	Green	45.1	Bycaught	She	198.48	72.74	0.14	Clear
PO_6	PO	2011	Green	45.1	Bycaught	She	209.81	45.33	0.1	Clear
PO_6	PO	2011	Green	45.1	Bycaught	She	128.24	26.49	0.06	Clear
PO_6	PO	2011	Green	45.1	Bycaught	She	8.59	5.61	0.05	White
PO_6	PO	2011	Green	45.1	Bycaught	She	44.15	20.6	0.08	White
PO_6	PO	2011	Green	45.1	Bycaught	Frag	12.56	10.52	0.53	Black
PO_6	PO	2011	Green	45.1	Bycaught	She	28.71	8.29	0.1	Clear
PO_6	PO	2011	Green	45.1	Bycaught	She	12.02	8.95	0.04	White
PO_6	PO	2011	Green	45.1	Bycaught	Frag	28.58	12.73	1.03	White
PO_6	PO	2011	Green	45.1	Bycaught	Frag	11.06	9.48	0.63	White
PO_6	PO	2011	Green	45.1	Bycaught	Frag	10.43	8.27	0.8	White
PO_6	PO	2011	Green	45.1	Bycaught	Frag	11.02	9.72	2.06	White
PO_6	PO	2011	Green	45.1	Bycaught	Frag	11.34	9.86	3.14	Clear
PO_6	PO	2011	Green	45.1	Bycaught	Frag	10.24	8.97	2.04	White
PO_6	PO	2011	Green	45.1	Bycaught	Frag	13.68	6.41	1.16	Clear
PO_6	PO	2011	Green	45.1	Bycaught	Frag	8.64	6.65	3.37	White
PO_6	PO	2011	Green	45.1	Bycaught	Frag	6.4	4.56	0.47	White
PO_6	PO	2011	Green	45.1	Bycaught	Frag	7.34	6.07	0.63	White
PO_6	PO	2011	Green	45.1	Bycaught	Frag	11.25	4.09	0.63	White
PO_6	PO	2011	Green	45.1	Bycaught	Frag	7.64	3.22	2	White
PO_6	PO	2011	Green	45.1	Bycaught	Frag	5.17	5	2.05	White
PO_6	PO	2011	Green	45.1	Bycaught	Frag	9.02	4.48	1.41	White
PO_6	PO	2011	Green	45.1	Bycaught	Frag	5.3	3.95	2.2	White
PO_6	PO	2011	Green	45.1	Bycaught	Frag	7.04	3.1	0.83	Clear
PO_6	PO	2011	Green	45.1	Bycaught	Frag	7.49	3.92	0.62	White
PO_6	PO	2011	Green	45.1	Bycaught	Frag	4.25	3.76	2.01	White
PO_6	PO	2011	Green	45.1	Bycaught	Frag	7.33	5.06	2.37	Blue
PO_6	PO	2011	Green	45.1	Bycaught	Thr	235.88	1.78	0.07	White
PO_6	PO	2011	Green	45.1	Bycaught	Frag	44.22	2.39	2.37	Black
PO_6	PO	2011	Green	45.1	Bycaught	Frag	28.16	2.57	0.97	Black
PO_6	PO	2011	Green	45.1	Bycaught	Foam	15.42	5.89	0.46	White
PO_6	PO	2011	Green	45.1	Bycaught	Foam	15.89	7.32	0.58	White
PO_6	PO	2011	Green	45.1	Bycaught	Foam	10.82	9.27	0.56	White
PO_6	PO	2011	Green	45.1	Bycaught	Foam	18.76	6.56	0.7	White
PO_6	PO	2011	Green	45.1	Bycaught	Foam	9.81	4.73	0.6	White
PO_10	PO	2011	Green	UNK	Bycaught	Frag	6.66	4.69	1.94	Clear
PO_10	PO	2011	Green	UNK	Bycaught	Frag	6.42	5.36	1.92	White
PO_10	PO	2011	Green	UNK	Bycaught	Frag	8.12	7.13	0.77	White
PO_10	PO	2011	Green	UNK	Bycaught	Frag	8.15	6.31	0.76	Orange
PO_10	PO	2011	Green	UNK	Bycaught	Thr	30.94	0.3	0.3	Blue
PO_10	PO	2011	Green	UNK	Bycaught	Thr	30.53	10.14	0.38	Green
PO_10	PO	2011	Green	UNK	Bycaught	Thr	28.68	12.24	1.18	Grey
PO_10	PO	2011	Green	UNK	Bycaught	Thr	87.88	0.24	0.24	Green
PO_10	PO	2011	Green	UNK	Bycaught	Thr	12.14	3.42	0.1	Green
PO_10	PO	2011	Green	UNK	Bycaught	She	27.26	17.6	0.08	White
PO_10	PO	2011	Green	UNK	Bycaught	She	104.89	17.69	0.07	Blue
PO_10	PO	2011	Green	UNK	Bycaught	She	122.19	27.09	0.06	Clear
PO_10	PO	2011	Green	UNK	Bycaught	She	48.85	7.31	0.04	White
PO_10	PO	2011	Green	UNK	Bycaught	She	140.3	41.06	0.07	Clear
PO_10	PO	2011	Green	UNK	Bycaught	She	73.74	18.01	0.04	Clear
PO_10	PO	2011	Green	UNK	Bycaught	She	34.34	15	0.03	White
PO_10	PO	2011	Green	UNK	Bycaught	She	42.84	14.15	0.11	White
PO_10	PO	2011	Green	UNK	Bycaught	She	31.5	18.32	0.16	White
PO_10	PO	2011	Green	UNK	Bycaught	She	149.51	23.19	0.07	Clear
PO_10	PO	2011	Green	UNK	Bycaught	She	23.22	16.69	0.03	White
PO_10	PO	2011	Green	UNK	Bycaught	She	17.31	12.3	0.04	White
PO_10	PO	2011	Green	UNK	Bycaught	She	29.41	11.81	0.02	Blue
PO_10	PO	2011	Green	UNK	Bycaught	She	19.89	8.73	0.07	White
PO_10	PO	2011	Green	UNK	Bycaught	She	23.18	16.91	0.1	White
PO_10	PO	2011	Green	UNK	Bycaught	She	32.18	15.88	0.01	Black
PO_10	PO	2011	Green	UNK	Bycaught	She	20.88	10.61	0.08	White
PO_10	PO	2011	Green	UNK	Bycaught	She	22.52	13.44	0.1	White
PO_10	PO	2011	Green	UNK	Bycaught	She	29.92	17.49	0.17	Clear
PO_10	PO	2011	Green	UNK	Bycaught	She	23.2	6.99	0.09	White
PO_10	PO	2011	Green	UNK	Bycaught	She	20.3	12.82	0.1	White
PO_10	PO	2011	Green	UNK	Bycaught	She	30.95	9.93	0.09	White
PO_10	PO	2011	Green	UNK	Bycaught	She	33.24	4.94	0.09	Black
PO_10	PO	2011	Green	UNK	Bycaught	She	12.67	9.14	1	Black
PO_10	PO	2011	Green	UNK	Bycaught	She	24.52	6.68	0.17	White
PO_10	PO	2011	Green	UNK	Bycaught	She	24.43	3.97	0.11	Black
PO_10	PO	2011	Green	UNK	Bycaught	She	15.13	5.19	0.05	Black
PO_10	PO	2011	Green	UNK	Bycaught	Frag	12.59	8.65	0.57	Black
PO_10	PO	2011	Green	UNK	Bycaught	She	27.22	11.02	0.03	White
PO_10	PO	2011	Green	UNK	Bycaught	She	11.14	5.98	0.11	White
PO_17	PO	2005	Green	7.8	Stranded	Frag	4.1	2.67	0.69	White
PO_17	PO	2005	Green	7.8	Stranded	Frag	5.11	3.02	0.73	White
PO_17	PO	2005	Green	7.8	Stranded	Frag	6.3	6.03	1.45	Blue
PO_17	PO	2005	Green	7.8	Stranded	The	24.27	2.96	2.96	Green
PO_17	PO	2005	Green	7.8	Stranded	Frag	6.76	3.47	0.96	Blue
PO_17	PO	2005	Green	7.8	Stranded	Frag	5.71	4.31	1.64	White
PO_17	PO	2005	Green	7.8	Stranded	Frag	5.63	3.31	1.24	Clear
PO_17	PO	2005	Green	7.8	Stranded	Frag	8.21	1.35	1.05	Green
PO_17	PO	2005	Green	7.8	Stranded	Frag	6.61	5.3	0.53	Black
PO_17	PO	2005	Green	7.8	Stranded	Frag	3.91	2.84	1.29	White
PO_17	PO	2005	Green	7.8	Stranded	Frag	3.84	2.39	1.86	Blue
PO_17	PO	2005	Green	7.8	Stranded	Thr	33.89	0.28	0.28	Clear
PO_17	PO	2005	Green	7.8	Stranded	Frag	7.63	4.3	1.28	White
PO_17	PO	2005	Green	7.8	Stranded	Ind	3.21	2.79	2.79	Clear
PO_17	PO	2005	Green	7.8	Stranded	Frag	5.05	2.54	1.47	White
PO_17	PO	2005	Green	7.8	Stranded	Frag	3.87	2.69	0.78	Green
PO_17	PO	2005	Green	7.8	Stranded	Frag	2.65	2.19	1.12	Green
PO_17	PO	2005	Green	7.8	Stranded	Frag	3.57	3.55	1.13	Clear
PO_17	PO	2005	Green	7.8	Stranded	Frag	3.72	4.18	1.33	Yellow
PO_17	PO	2005	Green	7.8	Stranded	Frag	3.13	2.92	0.69	White
PO_17	PO	2005	Green	7.8	Stranded	Frag	6.42	4.92	0.41	Yellow
PO_17	PO	2005	Green	7.8	Stranded	Frag	3.66	2.13	0.83	White
PO_17	PO	2005	Green	7.8	Stranded	Frag	1.99	1.79	1.27	Green
PO_17	PO	2005	Green	7.8	Stranded	Frag	3.09	1.73	1.08	Yellow
PO_17	PO	2005	Green	7.8	Stranded	Frag	4.27	2.59	1.12	Black
PO_17	PO	2005	Green	7.8	Stranded	Frag	3.65	2.69	0.45	White
PO_17	PO	2005	Green	7.8	Stranded	Frag	4.2	2.71	0.77	White
PO_17	PO	2005	Green	7.8	Stranded	Frag	0.94	0	0	Green
PO_17	PO	2005	Green	7.8	Stranded	Frag	2.24	1.41	1.5	Blue
PO_17	PO	2005	Green	7.8	Stranded	Frag	3.08	2.03	0.86	White
PO_17	PO	2005	Green	7.8	Stranded	Frag	2.72	1.59	0.81	White
PO_17	PO	2005	Green	7.8	Stranded	Frag	2.45	2.14	1.03	White
PO_17	PO	2005	Green	7.8	Stranded	Frag	3.94	3.53	0.4	White
PO_17	PO	2005	Green	7.8	Stranded	Frag	0	0	0	Clear
PO_17	PO	2005	Green	7.8	Stranded	Frag	0	0	0	White
PO_17	PO	2005	Green	7.8	Stranded	Frag	0	0	0	Clear
PO_17	PO	2005	Green	7.8	Stranded	Frag	0	0	0	Yellow
PO_17	PO	2005	Green	7.8	Stranded	Frag	4.29	1.69	0.4	White
PO_22	PO	UNK	Flatback	22.9	Stranded	She	10.53	5.49	0.04	Clear
PO_22	PO	UNK	Flatback	22.9	Stranded	She	11.63	4.08	0.04	Clear
PO_22	PO	UNK	Flatback	22.9	Stranded	Poth	39.08	8.18	0.14	White
PO_22	PO	UNK	Flatback	22.9	Stranded	Frag	6.89	6.01	0.91	White
PO_22	PO	UNK	Flatback	22.9	Stranded	She	8.77	4.4	0.09	Clear
PO_22	PO	UNK	Flatback	22.9	Stranded	Poth	12.77	2.83	0.39	Yellow
PO_22	PO	UNK	Flatback	22.9	Stranded	She	11.77	2.8	0.17	Clear
PO_22	PO	UNK	Flatback	22.9	Stranded	Frag	11.28	5.45	0.81	Yellow
PO_22	PO	UNK	Flatback	22.9	Stranded	Frag	8.14	4.28	0.97	White
PO_22	PO	UNK	Flatback	22.9	Stranded	Frag	7.82	6.86	0.8	White
PO_22	PO	UNK	Flatback	22.9	Stranded	Frag	4.92	3.61	0.87	White
PO_22	PO	UNK	Flatback	22.9	Stranded	She	10.35	6.05	0.2	Clear
PO_22	PO	UNK	Flatback	22.9	Stranded	Frag	3.94	2.53	1.1	White
PO_22	PO	UNK	Flatback	22.9	Stranded	Frag	7.43	4.86	1.53	Clear
PO_22	PO	UNK	Flatback	22.9	Stranded	Frag	5.41	3.66	0.87	White
PO_22	PO	UNK	Flatback	22.9	Stranded	Frag	12.33	5.86	0.92	Clear
PO_22	PO	UNK	Flatback	22.9	Stranded	Frag	6.49	2.22	1.57	Green
PO_22	PO	UNK	Flatback	22.9	Stranded	Frag	6.24	5.68	2.82	Blue
PO_22	PO	UNK	Flatback	22.9	Stranded	Frag	12.72	8.73	0.89	Clear
PO_22	PO	UNK	Flatback	22.9	Stranded	Frag	5.65	3.15	1.49	White
PO_22	PO	UNK	Flatback	22.9	Stranded	Frag	4.67	2.66	0.81	White
PO_22	PO	UNK	Flatback	22.9	Stranded	Frag	6.12	4.57	0.98	Clear
PO_22	PO	UNK	Flatback	22.9	Stranded	Frag	6.37	3.21	0.79	White
PO_22	PO	UNK	Flatback	22.9	Stranded	She	12.01	2.85	0.11	Clear
PO_22	PO	UNK	Flatback	22.9	Stranded	She	0	0	0	Clear
PO_22	PO	UNK	Flatback	22.9	Stranded	She	11.22	3.16	0.12	Clear
PO_22	PO	UNK	Flatback	22.9	Stranded	Frag	2.72	2.52	0.81	White
PO_22	PO	UNK	Flatback	22.9	Stranded	She	0	0	0	Clear
PO_22	PO	UNK	Flatback	22.9	Stranded	She	0	0	0	White
PO_22	PO	UNK	Flatback	22.9	Stranded	Frag	0	0	0	White
PO_22	PO	UNK	Flatback	22.9	Stranded	Frag	0	0	0	White
PO_22	PO	UNK	Flatback	22.9	Stranded	Frag	0	0	0	White
PO_22	PO	UNK	Flatback	22.9	Stranded	Frag	3.98	2.36	0.99	Green
PO_4	PO	1996	Green	8.3	Stranded	6.75	2.85	0.47	5.298	Yellow
PO_4	PO	1996	Green	8.3	Stranded	4.45	3.98	1.02	12.01	White
PO_4	PO	1996	Green	8.3	Stranded	3.8	2.52	0.64	4.413	Yellow
PO_4	PO	1996	Green	8.3	Stranded	0	0	0	3.236	Yellow
PO_4	PO	1996	Green	8.3	Stranded	0	0	0	2.829	Yellow
PO_4	PO	1996	Green	8.3	Stranded	0	0	0	1.97	Yellow
PO_4	PO	1996	Green	8.3	Stranded	0	0	0	4.895	Orange
PO_4	PO	1996	Green	8.3	Stranded	0	0	0	1.295	White
PO_4	PO	1996	Green	8.3	Stranded	0	0	0	1.134	White
PO_4	PO	1996	Green	8.3	Stranded	0	0	0	1.82	Green
PO_4	PO	1996	Green	8.3	Stranded	0	0	0	1.298	White
PO_4	PO	1996	Green	8.3	Stranded	0	0	0	0.485	Yellow
PO_4	PO	1996	Green	8.3	Stranded	0	0	0	0.601	Yellow
PO_8	PO	1996	Green	9.2	Stranded	Frag	5.71	4.7	0.84	Yellow
PO_8	PO	1996	Green	9.2	Stranded	Frag	3.71	1.78	1.58	Green

## Sheet: Polymer
PO/IO	Type	Colour	Polymer
IO	She	Brown	Nylon
IO	Frag	Green	Nylon
IO	Thr	Grey	Nylon
IO	Thr	Orange	Nylon
IO	Frag	Clear	Nylon
IO	Frag	Blue	Nylon
IO	Frag	White	Nylon
IO	Thr	White	Nylon
IO	Thr	White	Nylon
IO	She	Clear	Nylon
IO	Thr	Blue	Nylon
IO	Thr	Green	Nylon
IO	Thr	Blue	Nylon
IO	She	Clear	Polybutene
IO	Frag	White	Polybutene
IO	Thr	Yellow	Polybutene
IO	Thr	Yellow	Polybutene
IO	Thr	Green	Polybutene
IO	Poth	Black	Polydimethylisiloxane (silcon)
IO	Thr	Green	Polyethylene
IO	Thr	Green	Polyethylene
IO	Thr	Clear	Polyethylene
IO	Thr	Blue	Polyethylene
IO	Thr	Blue	Polyethylene
IO	Thr	Green	Polyethylene
IO	Thr	Blue	Polyethylene
IO	Thr	Yellow	Polyethylene
IO	Frag	Grey	Polyethylene
IO	Frag	Blue	Polyethylene
IO	Frag	Green	Polyethylene
IO	She	Clear	Polyethylene
IO	She	Green	Polyethylene
IO	She	Clear	Polyethylene
IO	She	White	Polyethylene
IO	She	Clear	Polyethylene
IO	Thr	Blue	Polyethylene
IO	Thr	Blue	Polyethylene
IO	Thr	Yellow	Polyethylene
IO	She	White	Polyethylene
IO	She	White	Polyethylene
IO	Frag	Black	Polyethylene
IO	Thr	White	Polyproplene
IO	Frag	White	Polyproplene
IO	Frag	White	Polyproplene
IO	Frag	Blue	Polyproplene
IO	Frag	Clear	Polyproplene
IO	She	Clear	Polyproplene
IO	She	Clear	Polyproplene
IO	She	White	Polyproplene
IO	She	White	Polyproplene
IO	Thr	Green	Polyproplene
IO	Thr	Orange	Polyproplene
IO	Frag	Blue	Polyproplene
PO	She	Blue	Ethylene/Vinyl Acetate Copolmyer
PO	She	Greem	Nylon
PO	Frag	Black	Nylon
PO	Frag	White	Nylon
PO	Poth	White	Nylon
PO	Poth	Yellow	Nylon
PO	Frag	Clear	Nylon
PO	She	Clear	Nylon
PO	Frag	White	Nylon
PO	Frag	Yellow	Nylon
PO	She	Clear	Nylon
PO	Frag	White	Nylon
PO	Ind	Clear	Nylon
PO	She	White	Nylon
PO	Thr	Blue	Nylon
PO	Frag	Clear	Nylon
PO	Frag	White	Nylon
PO	Frag	White	Nylon
PO	Frag	Black	Nylon
PO	Type	Green	Nylon
PO	Frag	Black	Nylon
PO	Frag	White	Nylon
PO	Frag	Yellow	Nylon
PO	Frag	Black	Nylon
PO	Frag	White	Nylon
PO	Frag	Green	Nylon
PO	Thr	Green	Nylon
PO	Frag	Blue	Nylon
PO	Frag	Brown	Nylon
PO	Frag	Pink	Nylon
PO	Frag	White	Nylon
PO	Thr	Blue	Nylon
PO	Thr	Blue	Nylon
PO	Frag	White	Nylon
PO	Ind	Orange	Nylon
PO	Frag	Pink	Nylon
PO	She	Black	Nylon
PO	She	White	Nylon
PO	Ind	Orange	Nylon
PO	Frag	Yellow	Nylon
PO	Frag	Black	Nylon
PO	She	White	Nylon
PO	She	Blue	Polybutene
PO	Frag	White	Polybutene
PO	She	Clear	Polybutene
PO	Frag	Green	Polyethylene
PO	Frag	Green	Polyethylene
PO	Frag	Green	Polyethylene
PO	Ind	Clear	Polyethylene
PO	Frag	Clear	Polyethylene
PO	Frag	Green	Polyethylene
PO	Frag	White	Polyethylene
PO	She	White	Polyethylene
PO	She	Black	Polyethylene
PO	She	Black	Polyethylene
PO	She	Black	Polyethylene
PO	She	Clear	Polyethylene
PO	Frag	Clear	Polyethylene
PO	She	Clear	Polyethylene
PO	She	Clear	Polyethylene
PO	Frag	Orange	Polyethylene
PO	She	Blue	Polyethylene
PO	Frag	Blue	Polyethylene
PO	Frag	Blue	Polyethylene
PO	Frag	Clear	Polyethylene
PO	Frag	White	Polyethylene
PO	Frag	Orange	Polyethylene
PO	Frag	Clear	Polyethylene
PO	She	Black	Polyethylene
PO	Frag	Clear	Polyethylene
PO	She	Black	Polyethylene
PO	She	Black	Polyethylene
PO	Ind	Clear	Polyethylene
PO	Frag	White	Polyethylene
PO	Frag	Clear	Polyethylene
PO	Frag	Clear	Polyethylene
PO	Frag	Clear	Polyethylene
PO	Frag	Clear	Polyethylene
PO	Frag	Clear	Polyethylene
PO	Frag	White	Polyethylene
PO	Frag	Yellow	Polyethylene
PO	Frag	Yellow	Polyethylene
PO	Frag	Green	Polyethylene
PO	Frag	Orange	Polyethylene
PO	Frag	Orange	Polyethylene
PO	Frag	White	Polyethylene
PO	Frag	Clear	Polyethylene
PO	Frag	Blue	Polyethylene
PO	She	Clear	Polyethylene
PO	Frag	White	Polyethylene
PO	Frag	Clear	Polyethylene
PO	Frag	Yellow	Polyethylene
PO	Frag	Clear	Polyethylene
PO	Frag	White	Polyethylene
PO	Frag	Clear	Polyethylene
PO	She	White	Polyethylene
PO	Frag	White	Polyethylene
PO	Thr	Green	Polyethylene
PO	Frag	Clear	Polyethylene
PO	Frag	Pink	Polyethylene
PO	She	Black	Polyethylene
PO	She	Yellow	Polyethylene
PO	Frag	White	Polyethylene
PO	She	Yellow	Polyethylene
PO	Frag	Clear	Polyethylene
PO	Frag	White	Polyethylene
PO	Frag	Clear	Polyethylene
PO	Thr	Green	Polyethylene
PO	She	Clear	Polyethylene
PO	She	Clear	Polyethylene
PO	She	Clear	Polyethylene
PO	She	Clear	Polyethylene
PO	Frag	White	Polyethylene
PO	Frag	White	Polyethylene
PO	Frag	White	Polyethylene
PO	Frag	White	Polyethylene
PO	Frag	White	Polyethylene
PO	Frag	White	Polyethylene
PO	Frag	White	Polyethylene
PO	Frag	White	Polyethylene
PO	Frag	White	Polyethylene
PO	Frag	White	Polyethylene
PO	Frag	White	Polyethylene
PO	Frag	White	Polyethylene
PO	Frag	White	Polyethylene
PO	Frag	White	Polyethylene
PO	Frag	Brown	Polyethylene
PO	Frag	Brown	Polyethylene
PO	Frag	Blue	Polyethylene
PO	Frag	Brown	Polyethylene
PO	Frag	Brown	Polyethylene
PO	Frag	White	Polyethylene
PO	Frag	White	Polyethylene
PO	Frag	White	Polyethylene
PO	Frag	White	Polyethylene
PO	Frag	Yellow	Polyethylene
PO	Frag	Clear	Polyethylene
PO	Frag	Clear	Polyethylene
PO	Frag	White	Polyethylene
PO	Frag	White	Polyethylene
PO	Frag	White	Polyethylene
PO	Frag	Yellow	Polyethylene
PO	Frag	Yellow	Polyethylene
PO	Frag	Yellow	Polyethylene
PO	Frag	Clear	Polyethylene
PO	Frag	White	Polyethylene
PO	Frag	White	Polyethylene
PO	She	Blue	Polyethylene
PO	Frag	White	Polyethylene
PO	She	Clear	Polyethylene
PO	She	Black	Polyethylene
PO	She	Clear	Polyethylene
PO	Frag	Clear	Polyethylene
PO	Frag	Pink	Polyethylene
PO	Frag	Orange	Polyethylene
PO	She	Clear	Polyethylene
PO	She	Clear	Polyethylene
PO	She	Clear	Polyethylene
PO	She	Clear	Polyethylene
PO	She	Black	Polyethylene
PO	Frag	White	Polyethylene
PO	Frag	Orange	Polyethylene
PO	Frag	Clear	Polyethylene
PO	Frag	Red	Polyethylene
PO	Ind	Clear	Polyethylene
PO	Frag	Pink	Polyethylene
PO	Frag	Clear	Polyethylene
PO	She	Green	Polyethylene
PO	Frag	Clear	Polyethylene
PO	Frag	Yellow	Polyethylene
PO	Frag	White	Polyethylene
PO	Frag	White	Polyethylene
PO	Frag	Pink	Polyethylene
PO	She	Clear	Polyethylene
PO	She	Clear	Polyethylene
PO	Frag	White	Polyethylene
PO	Frag	Pink	Polyethylene
PO	Thr	Grey	Polyethylene
PO	She	Clear	Polyethylene
PO	Frag	Blue	Polyethylene
PO	Frag	Clear	Polyethylene
PO	Frag	Green	Polyethylene
PO	She	White	Polyethylene
PO	Frag	White	Polyethylene
PO	She	Pink	Polyisoprene
PO	Poth	Yellow	Polyisoprene
PO	She	Clear	Polyoctylacrylate
PO	Poth	Clear	Polyproplene
PO	Thr	Green	Polyproplene
PO	Thr	Clear	Polyproplene
PO	Frag	Green	Polyproplene
PO	She	Blue	Polyproplene
PO	Frag	Clear	Polyproplene
PO	Frag	Red	Polyproplene
PO	Frag	White	Polyproplene
PO	She	Clear	Polyproplene
PO	She	White	Polyproplene
PO	She	Clear	Polyproplene
PO	She	White	Polyproplene
PO	She	Yellow	Polyproplene
PO	She	Yellow	Polyproplene
PO	Frag	Yellow	Polyproplene
PO	Frag	Yellow	Polyproplene
PO	Thr	White	Polyproplene
PO	Thr	Green	Polyproplene
PO	Thr	Green	Polyproplene
PO	Frag	Clear	Polyproplene
PO	Frag	Clear	Polyproplene
PO	Frag	Clear	Polyproplene
PO	Frag	White	Polyproplene
PO	Frag	Clear	Polyproplene
PO	Frag	Clear	Polyproplene
PO	She	Clear	Polyproplene
PO	She	Clear	Polyproplene
PO	She	Clear	Polyproplene
PO	She	Clear	Polyproplene
PO	She	Clear	Polyproplene
PO	Thr	White	Polyproplene
PO	She	Clear	Polyproplene
PO	Frag	White	Polyproplene
PO	She	Green	Polyproplene
PO	Frag	White	Polyproplene
PO	Frag	White	Polyproplene
PO	Frag	White	Polyproplene
PO	Frag	White	Polyproplene
PO	Ind	Clear	Polyproplene
PO	Thr	White	Polyproplene
PO	Frag	Green	Polyproplene
PO	Frag	Clear	Polyproplene
PO	She	Green	Polyproplene
PO	Thr	Green	Polyproplene
PO	She	White	Polyproplene
PO	Thr	Green	Polyproplene
PO	Thr	Green	Polyproplene
PO	She	Yellow	Polyproplene
PO	Frag	White	Polyproplene
PO	Foam	Yellow	Polystyrene
PO	Frag	White	Nylon
PO	Frag	Black	Nylon
PO	Frag	Clear	Nylon
