# Supplementary material for: Plastic Pollution and Small Juvenile Marine Turtles: A Potential Evolutionary Trap
Source: Frontiers journal article supplement (doi:10.3389/fmars.2021.699521), 2021-08-02
Supplement: Table_2.docx [file Table_2.docx]

**Supplemental Material**

| **Test** | **Location** |  |  | **χ2=** | **df=** | **p=** |
| --- | --- | --- | --- | --- | --- | --- |
| Kruskal-Wallis (KW) | PO | Species | Number plastic pieces | 15.98 | 4 | 0.003* |
|  |  | Species | Mass (g) ingested plastic | 13.14 | 4 | 0.01* |
|  | IO | Species | Number plastic pieces | 3.89 | 3 | 0.27 |
|  |  | Species | Mass (g) ingested plastic | 3.80 | 3 | 0.28 |

| **Test** | **Location** | **Species** |  |  | **R=** | **p=** |
| --- | --- | --- | --- | --- | --- | --- |
| Spearman’s Correlation | PO | Green | CCL | Body Burden Index | -0.30 | 0.11 |
|  |  |  | Body Condition Index | Number plastic pieces | 0.24 | 0.20 |
|  |  |  | Body Condition Index | Body Burden Index | -0.06 | 0.76 |
|  |  |  | Body Condition Index | Mass (g) ingested plastic | 0.47 | 0.01* |
|  | IO | Flatback | CCL | Body Burden Index | -0.52 | 0.04* |
|  |  |  | Body Condition Index | Number plastic pieces | 0.96 | 0.01* |
|  |  |  | Body Condition Index | Body Burden Index | -0.18 | 0.50 |
|  |  |  | Body Condition Index | Mass (g) ingested plastic | -0.14 | 0.61 |
|  |  |  |  |  |  |  |
|  | PO | Green | Year | Number plastic pieces | 0.16 | 0.36 |
|  |  |  | Year | Mass (g) ingested plastic | 0.25 | 0.15 |
|  |  |  | Year | Body Burden Index | 0.12 | 0.50 |

| **Test** | **Species** |  |  | **W or t value=** | **p=** |
| --- | --- | --- | --- | --- | --- |
| Wilcoxon Rank-Sum | Green (PO) | Stranded vs. bycaught | Number plastic pieces | 106.5 | 0.126 |
|  |  |  | Mass (g) ingested plastic | 54 | 0.001* |
|  |  |  | Body Burden Index | 153 | <0.001* |
|  | Green | PO vs. IO | Number plastic pieces | 673 | <0.001* |
|  |  |  | Mass (g) ingested plastic | 670 | <0.001* |
|  |  |  | Body Burden Index | 489 | <0.001* |
|  | Flatback | PO vs. IO | Number plastic pieces | 153.5 | 0.001* |
|  |  |  | Mass (g) ingested plastic | 152 | 0.001* |
|  |  |  | Body Burden Index | 147 | 0.002* |
| T-test | Green (PO) | Stranded vs. bycaught | CCL | -21 | <0.001* |

**Table S2.** Table of statistical results.
